# Supplementary material for: Predicting a local recurrence after breast-conserving therapy by gene expression profiling
Source: Breast Cancer Res. 2006 Oct 30;8(5):R62. doi: 10.1186/bcr1614 (PMC1779489; doi:10.1186/bcr1614)
Supplement: Additional file 3 — An Excel file containing the expression data for the hypoxia genes for all patients (training (local recurrence and non-local recurrence) and validation set separately) and the calculated hypoxia local recurrence centroid data and correlation values for all patients to this centroid. [file bcr1614-S3.xls]

## Sheet: WinSTAT Commands
2005-01-28 15:33:16	2005-01-28 18:04:58
1	100
	FALSE
	#REF!
	#REF!
	#REF!
	TRUE
	#REF!

## Sheet: WinSTAT Trigger
2

## Sheet: Local_Recurrence_training
CloneID_Original(Stanford_Array)	Symbol	Systemic_name	unigene_new_Rosetta	Average_hypoxia_for_LR_training	107	165	181	194	198	238	257	337	381
Non_centered_Pearson					0.687466	0.25397	0.752131	0.173041	0.551338	0.28193	0.43991	0.613024	0.616188
395708	DPYSL4	AB006713	Hs.100058	0.00771222	0.342701	-0.063186	-0.117956	0.043337	-0.079634	-0.037036	0.218466	-0.102267	-0.135015
345849	LOX	NM_002317	Hs.102267	-0.0365284	-0.178138	-0.144914	-0.044137	0.078052	-0.104598	0.23407	0.111246	-0.029949	-0.250388
324785	P4HA2	NM_004199	Hs.104772	-0.0806043	0.00737	0.042685	-0.154158	0.011478	-0.391989	0.007321	-0.022938	-0.097656	-0.127552
75254	CSRP2	NM_001321	Hs.10526	-0.0301823	-0.208115	-0.174536	-0.180828	0.189623	-0.007104	0.265896	0.009192	0.064278	-0.230047
625875	ERO1L	A_Contig57222_RC_NM_014584	Hs.10949	0.0194343	0.024347	0.13706	-0.036433	-0.0730605	-0.0028235	-0.0108165	0.136242	-0.0110665	0.011461
221707	DDIT4	NM_019058	Hs.111244	-0.112184	-0.402466	-0.32795	-0.163863	0.25449	-0.211633	0.323335	0.073723	-0.073251	-0.482044
1571993	CTSF	NM_003793	Hs.11590	-0.0367427	-0.008161	-0.019645	0.006263	0.055213	-0.150418	-0.199898	0.021758	-0.100566	0.06477
246851	HIPK1	AB014530	Hs.12259	0.0612044	0.068002	0.219784	-0.012773	0.038242	0.026771	0.099005	0.01412	0.079331	0.018358
823691	CCNG2	NM_004354	Hs.13291	-0.147689	-0.473071	-0.245587	-0.170697	-0.048625	0.257383	-0.315232	-0.076784	-0.080838	-0.175749
365098	BNIP3L	NM_004331	Hs.132955	-0.0539218	-0.009223	0.029197	-0.224649	0.018096	0.132139	-0.142627	-0.155358	-0.008565	-0.124306
1925587	KIAA1285	AB033111	Hs.145661	0.024234	0.105369	0.188006	-0.007772	-0.053023	-0.049143	0.075142	-0.09609	0.046341	0.009276
744923	KIAA0776	AB018319	Hs.149367	-0.0316523	0.061332	-0.030089	-0.055605	-0.040096	0.220821	-0.201628	-0.081633	-0.020043	-0.13793
471725	ITPR1	A_D26070_NM_002222_Contig36193_RC	Hs.149900	-0.0509337	0.069292	-0.266779	0.0838223	-0.0835163	0.208459	-0.319385	0.00665867	-0.0869777	-0.0699773
2308429	PPFIA4	AB020704	Hs.153648	0.0188049	0.027605	0.036811	0.096088	0.007137	-0.039577	-0.005443	0.044943	-0.006762	0.008442
823578	STC2	NM_003714	Hs.155223	-0.134513	-0.355318	0.114167	-0.200304	0.130039	-0.17878	-0.235409	-0.280668	-0.085906	-0.118441
770868	NAB2	NM_005967	Hs.159223	0.00389511	-0.064273	0.118267	-0.028191	0.023077	-0.035792	0.045574	-0.058917	0.023821	0.01149
454665	E2-230K	AK000926	Hs.16130	-0.00985111	-0.098519	0.09416	0.147535	-0.10021	-0.331154	0.071503	0.132757	0.211667	-0.216399
25389	SLC2A1	A_NM_006516_Contig40184	Hs.169902	-0.000875944	-0.114425	0.334098	-0.033372	-0.063755	-0.184057	0.085052	-0.0680515	-0.0265425	0.0631685
195988	OCIA	NM_017830	Hs.170291	0.0267983	0.007537	0.047996	0.026566	0.021243	0.211061	-0.037445	-0.104986	0.001883	0.06733
469297	BHLHB2	NM_003670	Hs.171825	-0.159549	-0.306302	-0.236481	-0.2876	0.058135	-0.259379	-0.117216	-0.042719	-0.09127	-0.153112
841620	DPYSL2	NM_001386	Hs.173381	0.0356441	0.338446	0.120117	-0.14646	0.143181	0.038058	-0.076232	-0.012869	-0.006495	-0.076949
1416782	CKB	NM_001823	Hs.173724	-0.0237563	0.174307	0.327594	-0.199935	-0.089676	-0.227468	-0.16085	-0.146598	0.153396	-0.044577
204569	HEMGN	NM_018437	Hs.176626	-0.0207888	0.015229	-0.081463	0.03007	0.027016	0.002184	-0.040864	-0.033313	0.001664	-0.107622
2310556	DUSP10	AB026436	Hs.177534	0.00592022	0.239018	0.343961	0.149131	-0.033171	0.015308	-0.425748	0.040183	-0.147985	-0.127415
1455835	GAL3ST1	NM_004861	Hs.17958	-0.010895	-0.020449	-0.056815	0.02004	-0.050269	-0.015662	0.088003	-0.027706	-0.030864	-0.004333
1758259	RAB20	NM_017817	Hs.179791	-0.0153206	0.066273	-0.092063	0.081098	0.037159	-0.166217	0.1546	0.063183	-0.04517	-0.236748
2557471	CRABP2	NM_001878	Hs.183650	-0.0621712	-0.476196	0.036513	-0.06369	-0.371874	-0.122499	0.106199	-0.048689	-0.076873	0.457568
46958	SULT4A1	NM_014351	Hs.189810	0.0267227	0.264879	0.053039	0.0018	-0.02795	0.026633	0.002863	-0.028921	-0.063713	0.011874
2322039	PPL	A_NM_002705__Contig34999_RC	Hs.192233	-0.0612476	-0.086196	-0.0029325	-0.174412	-0.081497	-0.160832	0.0280845	0.0731325	-0.0359835	-0.110592
283142	KIAA1244	AB033070	Hs.194408	0.0203074	0.088612	-0.029423	0.024976	0.181769	-0.079903	-0.105881	0.136231	-0.049219	0.015605
2562051	RAI3	NM_003979	Hs.194691	-0.0220817	-0.293433	-0.352145	0.468559	-0.195435	-0.175504	-0.019699	0.453983	-0.065172	-0.019889
1902764	PFKFB3	NM_004566	Hs.195471	-0.124248	-0.418484	0.067745	-0.150314	0.278681	-0.179859	-0.256767	0.180299	-0.18665	-0.452886
1566955	KIAA1715	Contig45011_RC	Hs.209561	-0.0124467	-0.187383	0.055535	0.059939	-0.016912	0.11743	-0.116068	-0.001522	-0.040012	0.016973
220376	TncRNA	A_U60873__AA553619_RC	Hs.240443	-0.0219346	-0.08418	0.044533	-0.060785	-0.01321	-0.0412935	-0.119206	-0.065274	-0.0127125	0.154717
135900	ARRDC3	AB037797	Hs.24684	0.0548663	-0.237345	0.021692	-0.222331	0.196321	0.310794	0.378927	-0.072089	0.041394	0.076434
2220269	POU5F1	NM_002701	Hs.249184	-0.00470922	0.015192	-0.012422	-0.093464	-0.101651	-0.020619	0.101361	0.027207	-0.021988	0.064001
565075	STC1	NM_003155	Hs.25590	-0.113343	0.063477	0.33207	-0.628407	0.011902	-0.058081	-0.483624	-0.515926	-0.323604	0.582106
841663	NARF	A_NM_012336__AL137729	Hs.256526	0.00425139	-0.063627	0.156743	0.084328	-0.06296	-0.076863	0.0910205	0.0066555	-0.026581	-0.0704535
950682	PFKP	D25328	Hs.26010	-0.28913	-0.545613	-0.078794	-0.527183	-0.096362	-0.489498	-0.05782	0.050906	-0.280146	-0.577664
430968	ENPP3	NM_005021	Hs.264750	0.00852178	0.043246	-0.006952	0.082253	-0.049793	0.018297	0.016604	-0.020346	0.025196	-0.031809
308026	C6orf55	NM_016485	Hs.267288	0.0141849	0.115066	-0.002994	0.048974	-0.003871	0.043266	0.071899	0.049396	-0.050929	-0.143143
897567	LDHA	NM_005566	Hs.2795	-0.0188894	0.07643	0.330222	0.044417	-0.052766	-0.331395	0.159522	-0.148612	-0.193408	-0.054415
1492276	RNASE4	A_NM_002937__NM_001145	Hs.283749	-0.155316	-0.200767	-0.358413	-0.220765	-0.101691	0.044776	-0.218431	-0.150449	-0.034067	-0.158037
246620	STRBP	NM_018387	Hs.287659	0.0262513	0.09069	0.186692	0.013293	-0.110436	-0.048	-0.242526	0.108286	0.012877	0.225386
428377	MGC26694	Contig1115_RC	Hs.303669	0.0481314	0.319949	-0.063209	-0.064584	0.107319	-0.044544	0.212005	0.002788	-0.027138	-0.009403
856174	PIK3R4	Y08991	Hs.306747	-0.0408642	-0.005135	-0.123115	0.040334	-0.01502	-0.050769	0.073774	-0.069604	-0.010757	-0.207486
461769	HLA-DRB5	AF005487	Hs.308026	-0.0439019	0.203359	-0.444622	0.396215	-0.176468	-0.07037	0.026793	0.024639	-0.12955	-0.225113
49284		A_NM_004112__Contig49632_RC	Hs.31339	0.00588439	-0.039404	0.0218795	-0.0123185	-0.030628	-0.0331165	0.0869925	0.013123	-0.0284505	0.074882
234004	WSB1	NM_015626	Hs.315379	-0.0710821	-0.099155	-0.142061	-0.151316	-0.004952	0.046021	-0.083464	-0.084392	-0.058755	-0.061665
1917716	NDRG1	A_NM_006096__Contig27182_RC	Hs.318567	-0.139158	-0.267232	-0.107911	-0.168817	-0.080289	-0.219533	0.019791	-0.029674	-0.229225	-0.169531
204660	RTTN	AL117635	Hs.31931	0.0165367	0.04014	0.192372	-0.015065	-0.063536	-0.011201	0.112186	-0.089253	0.055366	-0.072179
377452	JMJD1A	A_NM_018433__AB018285	Hs.321707	0.00390767	-0.016881	0.006972	-0.0404025	-0.03178	0.0889545	0.042332	-0.0215315	-0.031567	0.0390725
136919	CCL28	NM_019846	Hs.334633	0.0198353	-0.204512	0.10623	0.367028	-0.07887	0.047006	-0.058621	-0.093333	0.05181	0.04178
52422	SLC1A6	NM_005071	Hs.337391	-0.00694233	-0.001235	-0.011802	-0.026686	-0.041386	0.000798	-0.030117	-0.025074	0.047408	0.025613
711698	BRCA2	NM_000059	Hs.34012	0.009552	-0.024547	-0.008254	-0.000471	0.029517	0.027813	0.102425	-0.121554	0.01533	0.065709
504421	ADFP	NM_001122	Hs.3416	-0.0522402	-0.011609	-0.023083	-0.04751	0.008899	-0.261922	0.047361	0.091123	0.01656	-0.289981
1630936	EXOSC4	NM_019037	Hs.343589	0.0276874	0.089158	0.075458	-0.004816	-0.040283	-0.036921	0.200594	0.027468	-0.051797	-0.009674
383098	PRODH	A_NM_016335__NM_005974	Hs.343874	0.00812217	-0.0979555	-0.012296	-0.0224825	-0.007695	0.0422575	-0.0591175	0.209149	-0.002699	0.023938
269425	ZFHX1B	A_NM_014795__AF161345	Hs.34871	0.0192369	0.0441455	-0.0127715	-0.019787	0.143173	0.100248	-0.0724655	-0.0291105	-0.0206715	0.0403715
366815	SOX4	NM_003107	Hs.357901	0.0524401	-0.076662	0.107636	0.078134	-0.035404	0.093923	0.073248	0.168742	0.025083	0.037261
45512	LOC283666	AA608991_RC	Hs.359394	0.020381	-0.007509	0.132539	-0.007637	0.04124	-0.006448	0.022284	-0.022627	-0.007693	0.03928
882434	KIAA0779	A_Contig46050__Contig52501_RC__Contig63482_RC__AB018322	Hs.362996	0.0132809	0.0713885	0.0775685	-0.0210415	-0.0273212	0.0342315	0.0109152	-0.00022825	0.0258753	-0.0518598
162310	PMP22	NM_000304	Hs.372031	-0.03636	-0.210476	-0.190917	-0.221382	0.249787	0.02179	0.108446	0.03772	0.08013	-0.202338
219949		Contig44269_RC	Hs.37648	0.0513911	0.17829	0.028713	0.09738	0.086911	0.166701	-0.016239	-0.052286	0.044675	-0.071625
2449679	PLXNB3	A_NM_005393__AB033032	Hs.380742	0.0242923	0.221338	-0.140867	0.0203365	-0.053873	-0.01166	0.253734	0.0358365	0.0086885	-0.114903
431280		Contig56534_RC	Hs.381220	0.084006	0.138455	0.127502	0.134995	0.113808	0.104469	0.158671	-0.012427	-0.108184	0.098765
45632	GYS1	NM_002103	Hs.386225	0.0393064	0.045615	0.076386	0.076746	0.040163	-0.037287	0.092432	0.042313	-0.022886	0.040276
502151	SLC16A3	NM_004207	Hs.386678	-0.0947687	-0.346734	0.395129	-0.165815	0.117453	-0.202146	0.269508	-0.111764	-0.489153	-0.319396
488505	SLC6A8	NM_005629	Hs.388375	-0.0672676	0.011955	-0.247402	0.028103	-0.068989	-0.229622	-0.078422	-0.07895	-0.139723	0.197642
809569	WASPIP	A_NM_003387__Contig46778_RC	Hs.401414	0.0128796	-0.0622295	-0.0277145	0.102073	0.0644525	0.017085	0.002248	0.0297805	-0.017499	0.00772
487371	FBXO32	A_Contig56270_RC__Contig57076_RC__Contig50592	Hs.403933	-0.125716	-0.389838	-0.300583	-0.131211	-0.0476317	0.123303	0.117362	-0.027904	-0.184405	-0.290538
595318	SLC6A3	NM_001044	Hs.406	-0.00562689	0.00778	0.042263	0.028638	0.00374	-0.022481	-0.06077	-0.003009	0.029195	-0.075998
1637282	HK2	NM_000189	Hs.406266	0.0675644	0.025375	0.143536	0.282412	-0.026369	-0.003531	0.103958	0.036826	-0.029874	0.075747
741474	GPI	NM_000175	Hs.406458	0.0126013	0.216885	0.14463	0.034757	-0.005275	-0.275307	0.133609	0.061082	-0.072598	-0.124371
454930	NAV2	Contig40599_RC	Hs.407934	-0.00299567	-0.022091	0.026611	-0.068414	0.022161	-0.004692	-0.039639	-0.068201	0.062925	0.064379
171916	CNTNAP1	NM_003632	Hs.408730	-0.0127668	0.022768	-0.026727	0.035768	-0.012057	-0.013197	-0.060239	-0.068518	0.027636	-0.020335
263013	PLOD2	NM_000935	Hs.41270	0.00428611	-0.113613	0.051336	-0.074824	0.01947	0.008196	0.234027	-0.077523	0.001319	-0.009813
244307	SERPINE1	A_NM_000602__M16006	Hs.414795	-0.0938327	-0.382953	-0.104786	0.0735435	0.219539	-0.232821	-0.001639	-0.094178	-0.126531	-0.194668
714437	SEMA4B	Contig1386_RC	Hs.416077	-0.144547	-0.144093	-0.071062	-0.324309	-0.106317	-0.229699	-0.436118	0.205367	-0.009961	-0.184731
129332	MEG3	NM_018514	Hs.418271	-0.102382	-0.261449	-0.321405	0.039906	-0.001315	-0.00297	-0.105218	-0.158327	-0.035018	-0.075643
753467	SLC2A3	NM_006931	Hs.419240	-0.00973811	-0.082283	-0.067501	-0.103677	0.253118	-0.132722	0.265721	-0.125365	-0.111413	0.016479
79629	CXCR4	NM_003467	Hs.421986	0.0144068	-0.172179	-0.086433	0.153889	0.32093	-0.176365	0.306563	0.052285	-0.178815	-0.090214
2283783	CRA	NM_006697	Hs.425144	-0.0228952	-0.16102	0.00115	-0.063128	0.018172	-0.034118	-0.026043	0.009608	-0.005658	0.05498
66715	PPP5C	NM_006247	Hs.431861	0.00435122	-0.012997	0.022447	0.035365	-0.055651	-0.045148	0.049826	-0.013047	-0.000189	0.058555
1521706	JAG2	A_NM_002226__Contig51202_RC	Hs.433445	-0.00882644	-0.0507045	-0.061776	-0.0844015	0.134558	-0.0713845	0.066701	-0.100289	0.0019535	0.085905
1645668	PDK1	NM_002610	Hs.433611	0.0380602	0.097294	-0.03157	0.153294	0.013143	0.060856	0.07393	0.013849	-0.002912	-0.035342
42906	MPP2	NM_005374	Hs.436326	0.00317522	-0.015414	-0.000639	-0.003859	-0.038707	0.015414	0.050174	-0.034474	-0.013714	0.069796
595078	BHLHB3	A_Contig50565__Contig2710_RC	Hs.437282	0.0568979	-0.185395	0.165058	0.188819	0.163863	0.033231	0.172623	0.059503	0.031535	-0.117156
704049	LPIN2	NM_014646	Hs.437425	0.0682633	-0.111273	0.357956	0.210769	0.078891	0.090118	-0.004491	0.077086	0.012333	-0.097019
746007	FLJ10415	NM_018089	Hs.437647	-0.0424198	0.002633	-0.18379	-0.077369	-0.157754	-0.152029	0.166168	0.058142	0.031443	-0.069222
220658	MSH2	NM_000251	Hs.440394	-0.0129786	-0.051444	0.289055	-0.080603	-0.077176	-0.014923	0.06181	-0.168019	0.006011	-0.081518
165921	CEP2	A_NM_007186__Contig33602_RC	Hs.440606	-0.00441783	0.032026	0.0525415	0.019095	-0.0542535	-0.0304055	-0.078977	0.021967	0.0366175	-0.0383715
774446	ADM	NM_001124	Hs.441047	-0.284719	-0.193754	0.684669	-0.678117	-0.154313	-0.686875	-0.079248	-0.323066	-0.436807	-0.694961
51843	PIAS2	Contig21098_RC	Hs.441069	0.0190044	0.207223	-0.005222	-0.109932	0.115813	-0.097499	0.079846	-0.081204	0.026132	0.035883
1570311	FAM13A1	NM_014883	Hs.442818	0.0623006	0.122115	-0.246146	0.378469	-7.5e-05	0.218425	0.059085	0.012943	0.060199	-0.04431
929934	DST	AB018271	Hs.443518	-0.0479689	0.115115	-0.461383	-0.407949	-0.139084	0.666462	-0.169162	-0.031232	0.035227	-0.039714
122982	EGLN3	Contig38674_RC	Hs.443906	-0.0644116	0.088742	0.148282	-0.142336	-0.101277	-0.211578	0.017498	-0.04919	-0.159853	-0.169992
461759	OLR1	NM_002543	Hs.445299	0.0161834	-0.20716	-0.085402	0.093641	0.038661	0.048297	0.034976	0.226645	-0.002676	-0.001331
725677	PCTK3	A_X66362__AL161977	Hs.445402	-0.0789336	0.0752775	-0.0638955	-0.152232	-0.0961205	-0.221891	0.150942	-0.190328	-0.141146	-0.0710095
197651		Contig42328_RC	Hs.446589	-0.0143727	-0.245438	0.320516	-0.450959	0.378962	-0.226767	-0.170558	0.04069	-0.306047	0.530247
1581582	ZNF292	AB011102	Hs.448341	-0.0931663	-0.115049	-0.06989	-0.192905	-0.005907	0.308322	-0.299752	-0.211226	-0.082023	-0.170067
898218	IGFBP3	NM_000598	Hs.450230	0.0171446	0.00195	-0.059954	0.07453	0.074403	0.001046	0.068402	0.082825	-0.042619	-0.046282
626773	PLEKHA2	Contig3015_RC	Hs.470847	0.0234208	-0.055733	0.12285	0.045675	0.072067	-0.004043	-0.085024	0.005464	-0.112036	0.221567
714493	FNBP2	A_AK000885__Contig38681_RC__AB007925	Hs.5003	-0.021319	-0.0528123	0.0219437	-0.0340347	0.00956833	-0.140207	0.0607143	0.0179293	-0.0453947	-0.029578
843046	MKNK2	A_NM_017572__AL137615	Hs.512094	-0.1066	-0.177598	-0.184057	-0.190552	-0.021629	-0.172587	-0.143034	-0.188275	0.101979	0.016355
757462	E2IG5	NM_014367	Hs.5243	-0.0939337	-0.239314	-0.182392	-0.03704	0.002735	0.137336	0.06822	-0.187472	-0.150169	-0.257307
130858	FAM29A	A_NM_017645__Contig42505_RC	Hs.54617	0.00857194	0.0469895	0.010665	-0.051072	0.0390695	0.0586395	-0.003424	-0.0770865	0.0268485	0.026518
1643566	CA9	NM_001216	Hs.63287	-0.403902	-0.608243	-0.094519	-0.783562	-0.001352	-0.696102	-0.046729	-0.359192	-0.4682	-0.577219
51344	C14orf132	AK001590	Hs.6434	-0.0525142	-0.239347	-0.100232	-0.174009	0.14321	0.08392	-0.19219	-0.044411	-0.02382	0.074251
48626	INSIG2	AL080184	Hs.7089	0.0392277	-0.20612	0.171166	0.074236	0.017551	0.233064	0.012993	0.019384	0.052505	-0.02173
841664	CAV1	A_NM_001753__AF070648	Hs.74034	-0.0706069	-0.0977795	-0.279555	-0.224896	0.077974	0.14126	-0.024386	-0.165014	0.0186205	-0.081687
771323	PLOD	NM_000302	Hs.75093	0.0326534	-0.051825	0.015186	-0.023109	0.158917	-0.150283	0.385016	0.01753	0.015447	-0.072998
51532	ARL6IP	D31885	Hs.75249	0.015584	0.15793	0.194588	0.059009	-0.148387	0.035474	-0.08473	-0.200816	0.062835	0.064353
838802	P4HA1	A_NM_000917__Contig19530_RC	Hs.76768	-0.1043	-0.150436	-0.122012	-0.170675	0.0686785	-0.046294	-0.166153	-0.067185	-0.140005	-0.144615
1420501	THOP1	NM_003249	Hs.78769	-0.0703028	-0.102605	-0.024332	-0.258449	-0.11641	-0.255127	0.066767	-0.007066	-0.004232	0.068729
949939	PGK1	A_S81916__NM_000291	Hs.78771	0.00140817	0.0240735	0.16543	0.053661	0.026608	-0.091923	-0.005111	-0.0529765	-0.095709	-0.0113795
1881104	GNRH1	A_NM_000825__Contig40036_RC	Hs.82963	0.0539031	0.118161	0.0664915	-0.008978	0.018752	0.060897	0.096417	0.091276	-0.005778	0.0478895
47481	CLECSF2	NM_005127	Hs.85201	-0.0207841	-0.296305	-0.093089	0.009426	0.148249	0.395528	-0.070589	-0.208052	-0.042875	-0.02935
824933	NF1	A_NM_000267__AF055023	Hs.93207	-0.0340264	-0.108474	-0.082923	-0.0360475	-0.0337335	0.0038725	-0.0546685	-0.006474	0.040086	-0.0278755
137554	C10orf10	NM_007021	Hs.93675	-0.00608089	-0.105755	-0.033603	-0.018166	-0.04565	-0.042621	0.248583	-0.042163	-0.006367	-0.008986
1031747	ALKBH	A_NM_006020__Contig30575	Hs.94542	0.0270651	0.060419	0.0027025	0.0283515	-0.0154945	-0.0006705	0.02662	0.0610385	0.0481585	0.032461
69002	ANGPTL4	NM_016109	Hs.9613	-0.288301	-0.555392	-0.450762	-0.577013	-0.291352	-0.284511	0.038112	-0.156382	0.067164	-0.384573
795178	LDHC	NM_002301	Hs.99881	0.0278123	-0.079264	0.193419	0.07023	-0.010396	-0.059296	0.129407	0.076812	-0.00937	-0.061231

## Sheet: Training_all
CloneID_Original(Stanford_Array)	Symbol	Systemic_name	unigene_new_Rosetta	Average_hypoxia_for_LR_training	4	7	9	12	14	26	28	45	56	58	62	107	111	117	120	124	128	130	133	137	145	151	157	165	174	177	179	181	182	184	189	194	198	199	202	214	217	219	226	229	231	238	239	249	251
Label LR					4__0	7__0	9__0	12__0	14__0	26__0	28__0	45__0	56__0	58__0	62__0	107__1	111__0	117__0	120__0	124__0	128__0	130__0	133__0	137__0	145__0	151__0	157__0	165__1	174__0	177__0	179__0	181__1	182__0	184__0	189__0	194__1	198__1	199__0	202__0	214__0	217__0	219__0	226__0	229__0	231__0	238__1	239__0	249__0	251__0
Non_centered_Pearson					0.52901	0.337262	0.387311	-0.1848	0.323194	-0.030098	0.132403	0.421512	0.376793	0.441867	0.464973	0.687466	0.227557	-0.373361	0.277785	0.287468	0.352215	0.290709	0.379067	0.278508	0.181997	0.0434114	0.332384	0.25397	0.397275	-0.296383	-0.35964	0.752131	-0.268018	0.40368	0.33736	0.173041	0.551338	0.337337	-0.110976	0.283499	-0.269858	0.438152	0.141195	0.0671315	0.0257122	0.28193	0.380686	0.336442	0.276765
395708	DPYSL4	AB006713	Hs.100058	0.00771222	0.475688	0.040256	-0.104927	0.069992	-0.00341	0.226461	0.13612	0.072927	-0.006438	-0.050189	0.012552	0.342701	0.06035	0.400699	-0.268021	0.017357	-0.227404	0.036777	-0.076033	0.068006	0.336742	-0.044686	-0.170579	-0.063186	0.235131	-0.093597	-0.00171	-0.117956	0.24557	0.034562	0.018626	0.043337	-0.079634	-0.140638	-0.106258	-0.062968	0.034071	-0.058804	-0.265257	-0.033142	-0.180804	-0.037036	-0.135213	0.109549	0.111968
345849	LOX	NM_002317	Hs.102267	-0.0365284	-0.345375	0.071779	0.087734	0.777967	-0.082305	0.181712	-0.581708	-0.254451	-0.417728	-0.104748	-0.253362	-0.178138	0.101714	0.223043	-0.121624	0.143457	-0.114911	-0.09313	0.066599	0.182972	-0.308906	0.177884	-0.101692	-0.144914	0.116002	0.003362	0.407107	-0.044137	0.14977	0.212263	-0.079986	0.078052	-0.104598	0.019904	0.115408	-0.069103	0.114416	0.15373	-0.091427	-0.043899	0.045304	0.23407	-0.148011	0.051881	0.054288
324785	P4HA2	NM_004199	Hs.104772	-0.0806043	-0.307281	0.134843	0.003111	0.174286	-0.097768	0.192569	-0.155802	-0.101141	-0.285933	-0.049444	-0.023059	0.00737	0.212659	0.211308	-0.281744	0.104799	-0.21946	0.035017	-0.033241	0.223687	0.12665	0.235802	-0.058216	0.042685	-0.277488	-0.002019	0.169525	-0.154158	0.148267	-0.458017	-0.109565	0.011478	-0.391989	-0.171226	0.236296	0.044456	0.005733	0.141837	-0.141063	-0.105727	0.108891	0.007321	-0.19175	0.021294	-0.034917
75254	CSRP2	NM_001321	Hs.10526	-0.0301823	-0.234574	0.140644	0.194678	0.286859	-0.103722	0.06732	0.072109	-0.157537	-0.200805	-0.159808	-0.167743	-0.208115	-0.125186	-0.037543	0.071787	-0.179044	-0.185953	0.377965	-0.136796	0.016676	-0.148915	-0.054825	-0.263117	-0.174536	-0.260496	-0.335792	-0.005061	-0.180828	0.112028	0.863291	0.091773	0.189623	-0.007104	-0.004637	0.221988	-0.400639	-0.238287	0.181692	-0.017599	-0.378363	-0.178253	0.265896	-0.220097	-0.042858	0.033382
625875	ERO1L_A	A_Contig57222_RC_NM_014584	Hs.10949	0.0194343	-0.166401	-0.163924	-0.16955	0.054241	-0.184193	0.129627	-0.071217	-0.0972255	-0.115957	-0.0701715	-0.0342875	0.024347	0.0142305	0.148796	-0.047787	-0.086331	0.0032905	0.028423	-0.122383	-0.1136	-0.0983995	-0.0085125	-0.020204	0.13706	-0.175125	0.0532095	0.161427	-0.036433	-0.009974	-0.086846	0.092949	-0.0730605	-0.0028235	-0.129269	-0.02588	-0.092689	-0.0993215	-0.031386	0.177252	-0.0227525	0.177473	-0.0108165	-0.0996695	-0.067088	0.156256
221707	DDIT4	NM_019058	Hs.111244	-0.112184	-0.226839	-0.197268	-0.42703	0.360052	-0.165982	0.231262	-0.330718	-0.253592	-0.297119	-0.406432	-0.32106	-0.402466	-0.177165	0.207214	-0.287021	0.076257	-0.245325	0.533891	-0.060444	0.129154	-0.402176	0.082726	-0.368879	-0.32795	-0.318163	0.517164	0.226529	-0.163863	0.1302	-0.060591	-0.049405	0.25449	-0.211633	0.290124	0.225249	0.061617	0.377744	0.28248	0.494626	0.294168	-0.433977	0.323335	-0.264686	0.129285	0.085053
1571993	CTSF	NM_003793	Hs.11590	-0.0367427	0.199083	0.049921	0.270228	0.130663	0.096303	0.089603	0.178514	0.075167	0.000447	0.015299	-0.314263	-0.008161	-0.156996	0.015154	0.07947	0.001564	-0.148976	-0.366034	0.038177	0.239605	0.353401	0.103805	-0.122041	-0.019645	-0.07825	-0.299365	-0.185519	0.006263	-0.035312	-0.43556	-0.055311	0.055213	-0.150418	-0.163901	-0.192449	0.039867	0.079	-0.035484	-0.466425	-0.053849	-0.188188	-0.199898	0.215565	-0.253929	-0.341624
246851	HIPK1	AB014530	Hs.12259	0.0612044	-0.22986	0.008292	-0.167528	-0.156346	0.029605	-0.025546	-0.022896	-0.079319	0.110015	-0.093835	-0.297919	0.068002	-0.113451	0.077617	0.022751	0.062238	-0.057045	-0.056183	0.009428	-0.006197	0.129661	0.080356	-0.005189	0.219784	0.140934	0.076189	-0.024019	-0.012773	0.073809	-0.068857	0.096037	0.038242	0.026771	-0.006883	-0.089125	-0.036344	-0.034515	0.196034	0.134686	0.14441	-0.131184	0.099005	0.386016	-0.045225	0.08016
823691	CCNG2	NM_004354	Hs.13291	-0.147689	-0.192347	0.041125	-0.098302	-0.110289	0.315044	0.215845	0.165095	-0.003132	0.075752	-0.129831	-0.140223	-0.473071	-0.266876	0.155828	0.703408	-0.22787	-0.195494	-0.595018	0.135461	0.021013	-0.521785	-0.354847	0.098814	-0.245587	-0.335271	-0.297502	-0.203157	-0.170697	0.040588	-0.407394	0.082245	-0.048625	0.257383	-0.17032	-0.328266	0.284254	0.095235	0.027548	-0.547004	-0.02195	0.245841	-0.315232	0.123292	-0.044914	-0.024129
365098	BNIP3L	NM_004331	Hs.132955	-0.0539218	-0.009276	-0.048448	-0.04495	0.014904	0.071879	0.182847	0.099077	0.014852	-0.088022	-0.200617	-0.213331	-0.009223	0.005654	0.075112	0.15655	0.018624	0.075782	-0.204706	-0.0534	-0.020536	-0.015541	0.054097	0.322111	0.029197	-0.121718	-0.173496	0.082959	-0.224649	0.090434	-0.276127	-0.064301	0.018096	0.132139	-0.048001	-0.007513	0.072547	-0.015972	0.026772	-0.239529	-0.074996	0.048673	-0.142627	0.243759	-0.166531	-0.003696
1925587	KIAA1285	AB033111	Hs.145661	0.024234	0.205447	-0.12605	0.176922	0.091668	-0.100412	-0.238292	-0.283111	0.039278	-0.094577	-0.017941	0.05632	0.105369	0.125571	0.05942	-0.114959	-0.044552	-0.085033	0.023366	-0.094669	-0.011605	-0.282187	-0.101648	-0.080447	0.188006	0.091739	-0.041482	-0.016118	-0.007772	-0.12014	0.021345	-0.002318	-0.053023	-0.049143	0.065809	-0.013635	-0.029657	0.062645	-0.012843	0.155016	0.035704	0.065603	0.075142	-0.121522	-0.021175	0.022783
744923	KIAA0776	AB018319	Hs.149367	-0.0316523	0.092507	-0.085491	-0.338782	-0.193292	-0.170711	-0.077812	0.176876	-0.221348	0.258914	-0.103512	-0.15007	0.061332	-0.400372	0.043793	0.235541	-0.101925	-0.001649	-0.101271	-0.007677	-0.188427	-0.149146	-0.051778	0.055164	-0.030089	0.017167	-0.138894	0.096756	-0.055605	-0.267844	-0.044806	0.208778	-0.040096	0.220821	-0.058894	0.077942	-0.108256	-0.383418	-0.185376	0.008675	-0.259357	0.012925	-0.201628	0.130854	0.062517	-0.017438
471725	ITPR1_A	A_D26070_NM_002222_Contig36193_RC	Hs.149900	-0.0509337	-0.244162	0.04653	-0.239848	-0.350754	0.255576	0.336618	0.00277233	-0.200725	0.035689	0.0114363	0.0269483	0.069292	-0.278811	-0.111223	0.253049	0.25635	-0.15652	-0.297361	-0.0801973	0.0913317	0.106247	-0.283267	-0.0896593	-0.266779	0.00353633	-0.00708867	-0.14695	0.0838223	0.069416	-0.258201	0.0921533	-0.0835163	0.208459	0.0407087	-0.357159	-0.008441	0.398592	0.141655	-0.068841	-0.0781323	-0.0852783	-0.319385	1.09519	-0.232304	0.157371
2308429	PPFIA4	AB020704	Hs.153648	0.0188049	0.035251	0.06106	0.159021	0.102124	0.068097	-0.036983	0.005553	0.14592	-0.016796	0.048752	0.012256	0.027605	0.039755	0.011484	-0.062416	0.043579	0.133354	0.029769	0.056214	0.038138	0.206704	0.046172	0.027139	0.036811	0.123666	0.149095	-0.009763	0.096088	-0.008673	0.052709	0.004586	0.007137	-0.039577	0.092237	0.055411	0.003442	0.103019	-0.029654	0.302019	0.10882	0.008916	-0.005443	-0.078294	0.042015	0.058569
823578	STC2	NM_003714	Hs.155223	-0.134513	-0.972345	-0.039643	0.594811	-0.490608	-0.218198	-0.015247	-0.133953	0.745229	-0.332342	0.013166	-0.668802	-0.355318	-0.465285	-0.068664	0.400447	0.534828	0.219104	-0.209304	-0.087693	0.149187	-0.327615	-0.112484	0.588238	0.114167	-0.124145	-0.210627	-0.337459	-0.200304	0.093642	-0.100317	-0.128531	0.130039	-0.17878	-0.097535	-0.129853	-0.074575	-0.159739	0.216393	-0.30073	-0.285478	-0.072738	-0.235409	-0.103361	-0.247005	-0.257149
770868	NAB2	NM_005967	Hs.159223	0.00389511	0.107339	-0.002209	0.027638	0.144481	0.041743	0.05545	0.104779	0.161594	-0.018311	0.012765	0.090312	-0.064273	0.031164	0.003122	0.11243	0.036187	-0.009262	0.037049	0.024873	0.040635	0.196228	0.047903	0.07652	0.118267	0.032683	0.029527	-0.002034	-0.028191	-0.018705	0.044974	-0.084775	0.023077	-0.035792	0.103884	0.012921	-0.00066	-0.003925	-0.036949	0.103744	0.063507	0.065442	0.045574	-0.091279	-0.05975	-0.043283
454665	E2-230K	AK000926	Hs.16130	-0.00985111	-0.172483	-0.071925	-0.079199	0.005446	-0.076973	-0.06044	-0.163123	0.167131	-0.066833	-0.119027	0.250869	-0.098519	0.007051	-0.078625	-0.131546	-0.034643	-0.165291	0.600415	-0.153224	-0.044697	-0.060377	-0.117632	-0.113914	0.09416	-0.012426	0.278896	-0.028217	0.147535	-0.083691	0.013278	-0.195432	-0.10021	-0.331154	-0.145796	-0.103964	0.006977	0.3176	-0.123721	0.044883	0.031626	-0.067306	0.071503	-0.190314	0.409582	0.523095
25389	SLC2A1_A	A_NM_006516_Contig40184	Hs.169902	-0.000875944	0.20442	-0.0805255	-0.114559	0.179456	-0.052085	-0.110334	-0.126484	0.0248405	-0.177078	-0.165248	-0.032408	-0.114425	0.033489	0.054318	-0.131199	0.0254905	-0.03809	-0.009847	-0.061464	-0.0991	-0.0086685	-0.064454	0.0708535	0.334098	-0.016937	0.036775	-0.069783	-0.033372	-0.0372805	-0.0251815	-0.0377505	-0.063755	-0.184057	-0.09762	-0.0127515	-0.11117	-0.0158045	-0.198439	0.0952425	0.075288	0.003336	0.085052	-0.242752	-0.007274	-0.091392
195988	OCIA	NM_017830	Hs.170291	0.0267983	-0.036671	-0.008008	0.182921	0.010311	-0.015529	0.050901	0.042615	0.079398	0.093153	0.140081	-0.018535	0.007537	-0.011466	0.05613	0.157376	-0.110003	-0.062919	-0.237497	-0.069754	-0.094616	0.101243	-0.085147	0.059018	0.047996	0.030274	0.050079	-0.16217	0.026566	-0.025987	0.056135	0.035007	0.021243	0.211061	-0.0985	-0.013586	0.06031	0.078804	0.002478	-0.068017	0.013311	0.074354	-0.037445	0.072994	-0.094732	-0.147869
469297	BHLHB2	NM_003670	Hs.171825	-0.159549	0.005229	0.115612	0.105654	-0.138693	0.209832	0.071452	-0.098481	0.064779	-0.076987	-0.120635	0.135423	-0.306302	0.047069	0.457776	0.033015	0.218208	-0.108335	-0.334166	-0.006861	0.231913	-0.191759	-0.344299	0.237308	-0.236481	0.069535	0.124538	-0.070215	-0.2876	0.119656	-0.345129	-0.341764	0.058135	-0.259379	0.05009	-0.310133	0.03932	0.162812	0.124251	-0.427707	-0.027032	0.081533	-0.117216	-0.111194	-0.092749	-0.162055
841620	DPYSL2	NM_001386	Hs.173381	0.0356441	-0.245287	0.177902	-0.104759	0.263271	0.214589	0.173209	0.280276	-0.07392	-0.036317	-0.304902	-0.04554	0.338446	-0.051378	0.019267	-0.12338	-0.09746	-0.042096	-0.417386	-0.103166	0.140804	-0.206733	-0.003712	-0.4086	0.120117	-0.682785	-0.217092	0.063629	-0.14646	0.092759	0.304716	-0.008324	0.143181	0.038058	-0.126346	0.039008	-0.15966	-0.428045	0.066117	-0.095706	-0.264376	-0.040055	-0.076232	0.057048	-0.179073	-0.102254
1416782	CKB	NM_001823	Hs.173724	-0.0237563	-0.157264	-0.244675	-0.145141	0.647212	0.077435	0.231838	-0.575905	-0.340692	0.063999	-0.668902	-0.436755	0.174307	0.038588	0.160594	-0.235944	-0.101043	0.246498	0.177735	-0.241422	-0.204567	-0.34338	-0.340772	-0.257645	0.327594	-0.30662	-0.220046	0.021717	-0.199935	-0.194755	-0.036988	-0.181453	-0.089676	-0.227468	-0.220225	-0.210859	-0.152242	-0.094325	-0.242282	-0.013898	-0.20091	1.14465	-0.16085	-0.305486	-0.344247	0.00697
204569	HEMGN	NM_018437	Hs.176626	-0.0207888	0.860248	0.317193	0.130806	-0.313707	-0.179131	0.632238	-1.68634	0.197778	0.648604	0.106002	0.186393	0.015229	-0.129285	-0.182674	-0.134285	-0.005263	-0.010117	0.003315	0.044829	-0.093422	-0.019746	0.048226	0.008328	-0.081463	0.023351	0.05	0.098077	0.03007	-0.01061	0.06396	-0.018545	0.027016	0.002184	-0.07655	-0.038329	-0.04852	-0.072845	-0.054102	0.06064	0.115073	-0.048407	-0.040864	-0.179221	0.05712	-0.201446
2310556	DUSP10	AB026436	Hs.177534	0.00592022	0.037632	0.215701	0.020287	-0.052771	0.063533	0.276492	-0.143812	-0.038216	-0.199761	-0.562627	0.173957	0.239018	0.322079	-0.117021	0.022562	-0.124302	0.092494	0.316044	0.203834	0.000213	0.033506	0.214547	-0.313751	0.343961	0.101621	-0.293212	0.0886	0.149131	-0.152754	-0.18647	0.097177	-0.033171	0.015308	-0.107805	0.045921	0.090034	-0.07886	0.14983	-0.206965	-0.169448	0.126905	-0.425748	-0.534588	-0.147374	0.153163
1455835	GAL3ST1	NM_004861	Hs.17958	-0.010895	0.017905	0.088201	0.264664	0.604297	-0.10756	0.145413	0.295108	-0.085157	-0.045006	0.009904	0.113098	-0.020449	-0.061974	-0.004586	-0.084023	-0.019732	0.004948	-0.02846	0.031112	0.011794	-0.126671	-0.058955	-0.028999	-0.056815	0.013344	0.143722	-0.032177	0.02004	0.039499	0.049261	-0.040921	-0.050269	-0.015662	0.038453	0.143176	-0.077328	0.222852	0.010341	0.10212	0.123994	0.177691	0.088003	0.065646	-0.055758	-0.08793
1758259	RAB20	NM_017817	Hs.179791	-0.0153206	0.207279	-0.018041	0.208148	0.006955	0.009227	0.099957	0.066354	-0.081189	-0.22982	-0.1046	0.088366	0.066273	0.03681	0.317277	0.120216	-0.158744	-0.030661	0.127771	0.022797	-0.045266	-0.123842	0.310233	0.167419	-0.092063	-0.138582	0.034291	-0.110015	0.081098	0.167085	-0.052805	-0.147351	0.037159	-0.166217	-0.164333	-0.033875	-0.068856	0.140719	-0.063186	0.191448	0.042277	-0.045504	0.1546	-0.350873	0.018782	-0.019511
2557471	CRABP2	NM_001878	Hs.183650	-0.0621712	0.016807	-0.46394	-0.297913	-0.60694	-0.199619	-0.108451	-0.180234	-0.19557	0.112122	0.314607	-0.615224	-0.476196	0.117667	-0.151805	-0.542683	-0.374789	-0.258465	-0.42565	-0.33586	-0.183045	0.162058	-0.023791	0.030579	0.036513	0.013362	0.366165	-0.075379	-0.06369	-0.190031	-0.660508	-0.16554	-0.371874	-0.122499	-0.021655	0.160751	-0.447036	-0.249885	-0.355354	-0.059977	0.343601	0.015187	0.106199	-0.512016	-0.257087	-0.30554
46958	SULT4A1	NM_014351	Hs.189810	0.0267227	-0.037146	-0.059476	-0.147949	0.063351	0.009325	-0.144395	-0.002517	0.112086	-0.009141	0.041576	0.019233	0.264879	-0.141593	-0.009703	-0.066406	-0.030064	-0.132055	0.050994	-0.057491	-0.123604	0.085893	0.133627	-0.005485	0.053039	-0.059402	0.289288	-0.070793	0.0018	-0.02225	-0.032489	0.082519	-0.02795	0.026633	-0.105914	-0.004143	-0.083306	-0.062515	0.106771	0.26899	-0.116074	-0.026152	0.002863	0.064364	-0.019464	0.026402
2322039	PPL_A	A_NM_002705__Contig34999_RC	Hs.192233	-0.0612476	-0.197817	0.118709	-0.0527515	-0.092789	0.0173055	0.0136015	0.0330325	-0.129292	-0.169837	-0.102891	-0.128165	-0.086196	-0.085521	0.183862	-0.0614785	0.141391	0.291729	0.109784	-0.0196675	0.057011	-0.212126	-0.0016175	0.136742	-0.0029325	-0.110413	0.140844	-0.037555	-0.174412	0.0791515	-0.322273	-0.108811	-0.081497	-0.160832	0.067169	0.181605	0.111467	0.195431	0.0497475	0.07075	-0.021272	0.012376	0.0280845	0.182239	-0.0409665	-0.11044
283142	KIAA1244	AB033070	Hs.194408	0.0203074	0.030322	0.020725	-0.097024	0.086961	0.29543	-0.164544	0.41954	0.451066	-0.0419	0.019883	0.059768	0.088612	-0.063045	0.058312	-0.04129	0.037445	0.147404	0.348824	0.043875	-0.039059	0.237494	-0.001357	0.045728	-0.029423	0.218671	-0.135138	0.066306	0.024976	-0.139387	-0.099758	-0.129743	0.181769	-0.079903	0.07047	0.00225	0.185624	0.050782	-0.054537	-0.241508	-0.049358	0.091033	-0.105881	0.008437	-0.008736	0.063526
2562051	RAI3	NM_003979	Hs.194691	-0.0220817	-0.289117	-0.284966	-0.386464	-0.066318	0.075443	0.217497	-0.910482	0.464043	-0.678193	-0.467729	0.440841	-0.293433	-0.0698	0.14302	-0.377835	-0.175446	0.022529	-0.263762	0.206059	-0.036068	-0.829488	-0.074083	0.148265	-0.352145	0.220674	-0.16791	0.128193	0.468559	0.187203	-0.605008	-0.416008	-0.195435	-0.175504	-0.17407	0.241449	0.061407	0.169236	-0.016514	-1.38563	0.135564	0.218134	-0.019699	-0.138215	0.041211	0.018337
1902764	PFKFB3	NM_004566	Hs.195471	-0.124248	-0.543108	-0.349427	-0.584117	-0.02873	-0.382806	-0.289473	-0.225075	-0.616152	-0.085702	-0.125432	-0.159125	-0.418484	-0.039059	-0.084718	-0.017891	0.281585	-0.008667	-0.016223	-0.110335	-0.119804	-0.229068	-0.234599	0.133149	0.067745	0.12443	0.324833	0.370961	-0.150314	0.003067	-0.516428	-0.2557	0.278681	-0.179859	-0.101992	-0.066861	0.020396	-0.226701	-0.145559	-0.224926	0.140908	0.06964	-0.256767	-0.327385	0.078907	-0.175351
1566955	KIAA1715	Contig45011_RC	Hs.209561	-0.0124467	0.125324	-0.185669	-0.12888	0.181443	-0.202576	0.05992	0.057316	-0.326065	0.079073	0.183268	0.055149	-0.187383	0.003376	0.154438	0.318239	-0.088846	-0.069642	-0.077993	-0.091769	-0.057718	-0.187034	0.020491	-0.101267	0.055535	0.046056	0.164959	0.127995	0.059939	-0.020222	0.092926	0.06501	-0.016912	0.11743	-0.144158	-0.040882	-0.085394	-0.096602	-0.174496	-0.022295	-0.155495	-0.106634	-0.116068	0.074531	0.059665	-0.0682
220376	TncRNA_A	A_U60873__AA553619_RC	Hs.240443	-0.0219346	-0.337579	-0.234802	-0.268023	0.219253	-0.0683385	-0.044518	-0.289012	-0.14994	-0.0842825	0.0009705	-0.158062	-0.08418	0.141591	0.0061205	-0.188933	-0.121719	0.0856805	-0.006898	-0.081324	0.286181	0.065682	-0.0482565	0.0553435	0.044533	-0.043847	0.0594645	0.0231915	-0.060785	-0.0359935	0.063418	0.0473875	-0.01321	-0.0412935	0.417841	-0.0303305	-0.0381285	0.305395	0.083698	-0.212442	0.132943	-0.012194	-0.119206	-0.0161215	-0.065814	0.179942
135900	ARRDC3	AB037797	Hs.24684	0.0548663	-0.075655	0.037264	-0.37134	0.212535	-0.256587	0.173037	0.199303	-0.189484	0.097142	-0.109785	-0.158915	-0.237345	-0.117759	0.093468	0.135157	-0.282485	0.020836	0.000377	-0.027797	-0.083902	-0.330465	0.11433	-0.060749	0.021692	-0.268166	-0.099146	0.18725	-0.222331	0.138419	0.235333	0.090322	0.196321	0.310794	-0.098539	0.411062	-0.013282	-0.268742	0.119566	-0.154821	-0.106814	-0.454518	0.378927	0.273347	0.028832	-0.240901
2220269	POU5F1	NM_002701	Hs.249184	-0.00470922	-0.235467	-0.105931	0.052295	-0.053549	-0.115432	0.02624	-0.302191	-0.153589	-0.132513	0.152623	-0.097449	0.015192	0.065903	-0.007777	-0.139123	-0.021929	-0.034259	-0.047194	-0.133166	-0.033814	0.043545	-0.08682	-0.070602	-0.012422	0.081113	0.229263	0.032506	-0.093464	-0.083193	0.070617	-0.028929	-0.101651	-0.020619	0.14825	0.022117	-0.011998	-0.083853	0.003503	0.038997	0.050067	0.062274	0.101361	0.002322	-0.060507	0.01983
565075	STC1	NM_003155	Hs.25590	-0.113343	-0.545221	-0.706166	-0.590835	-0.23759	-0.550905	-0.62354	-1.00142	0.453872	-0.309144	0.002302	-0.263463	0.063477	-0.170757	0.004767	-0.092811	0.2047	0.568877	-0.025387	-0.587337	-0.358351	-0.514486	-0.355072	-0.360163	0.33207	-0.634731	-0.19412	-0.124963	-0.628407	-0.058499	-0.378948	-0.361808	0.011902	-0.058081	-0.555774	-0.167978	-0.374723	-0.268807	-0.165873	-0.382857	-0.021239	-0.523116	-0.483624	0.061178	-0.262098	-0.486351
841663	NARF_A	A_NM_012336__AL137729	Hs.256526	0.00425139	0.027375	0.0558925	0.0271035	-0.128161	-0.0965395	-0.103601	0.187934	0.0275005	0.162409	-0.224372	0.136857	-0.063627	0.030866	-0.036233	-0.120972	-0.116634	0.0287875	0.463452	-0.0322185	-0.11256	-0.211965	-0.032453	-0.0360305	0.156743	-0.0421115	0.254535	0.0689465	0.084328	0.0581195	0.064642	-0.066012	-0.06296	-0.076863	-0.103208	0.069356	0.0217225	0.0871455	0.02098	-0.22941	0.0349935	-0.129967	0.0910205	-0.0514625	0.122573	0.30709
950682	PFKP	D25328	Hs.26010	-0.28913	-0.418968	-0.156254	-0.625072	0.222546	-0.338092	-0.12128	-0.265492	-0.278348	-0.107983	-0.078801	-0.336579	-0.545613	-0.325686	-0.123002	-0.277815	-0.227644	-0.475228	0.191321	-0.132694	-0.185698	-0.435432	0.228894	-0.412121	-0.078794	-0.349318	0.425829	0.215177	-0.527183	0.152952	0.059708	0.113062	-0.096362	-0.489498	-0.385248	0.410199	-0.173249	0.56559	-0.258061	0.466842	0.794929	0.389188	-0.05782	-0.509922	-0.066912	0.190797
430968	ENPP3	NM_005021	Hs.264750	0.00852178	-0.155992	-0.062939	0.237169	-0.628047	0.122409	-0.71186	-1.53765	0.117161	-0.23377	-0.030271	0.207992	0.043246	0.175396	-0.004839	0.241127	0.019842	0.120461	0.03015	0.115258	0.076415	0.289851	0.045764	0.034636	-0.006952	0.136669	0.010774	0.078418	0.082253	0.013047	0.041302	-0.082165	-0.049793	0.018297	0.074893	0.027987	0.101113	-0.025696	-0.08357	0.121151	-0.013046	0.160779	0.016604	-0.019413	-0.036456	-0.022676
308026	C6orf55	NM_016485	Hs.267288	0.0141849	0.066729	-0.021814	-0.094617	-0.193697	-0.012449	-0.121608	-0.045376	0.003378	-0.055845	-0.111084	0.043556	0.115066	-0.071306	-0.049198	0.025581	-0.131927	-0.3114	0.194413	-0.137019	-0.166777	-0.047828	0.011253	-0.141451	-0.002994	0.117331	0.034934	0.339386	0.048974	0.007406	0.116968	0.138078	-0.003871	0.043266	-0.227414	0.084095	0.126892	-0.011925	-0.081969	0.170253	-0.10564	0.104922	0.071899	-0.230618	0.1169	-0.112895
897567	LDHA	NM_005566	Hs.2795	-0.0188894	-0.059901	-0.138559	-0.077871	0.15229	-0.064059	0.01705	-0.266629	-0.254798	-0.405181	-0.149803	-0.230752	0.07643	0.0049	0.057448	-0.354113	-0.209361	-0.366985	-0.228055	-0.046443	0.076345	-0.115818	0.101317	-0.246006	0.330222	-0.099872	0.109171	0.072022	0.044417	0.053792	-0.069464	-0.307007	-0.052766	-0.331395	0.004943	0.132322	-0.001885	0.256439	-0.08049	-0.009409	0.25771	0.050732	0.159522	-0.170039	0.129151	-0.024304
1492276	RNASE4_A	A_NM_002937__NM_001145	Hs.283749	-0.155316	-0.107441	0.0642285	-0.0952925	-0.273684	0.1648	0.137432	0.29932	0.0845005	0.0457375	-0.221268	-0.143865	-0.200767	-0.002497	0.132381	0.338898	0.245499	0.0129075	-0.06135	0.142579	-0.0379715	0.0067705	-0.151301	-0.005767	-0.358413	-0.295633	-0.383096	-0.164309	-0.220765	-0.005449	-0.204218	-0.012165	-0.101691	0.044776	-0.181942	-0.0554785	0.068105	-0.317999	-0.0115845	-0.128028	-0.0058945	-0.0358865	-0.218431	0.257236	-0.169832	-0.086598
246620	STRBP	NM_018387	Hs.287659	0.0262513	0.092312	-0.151922	-0.048116	-0.167141	-0.190273	-0.174136	-0.144779	-0.158147	0.032632	0.138082	0.046448	0.09069	0.151524	-0.019344	0.135536	0.162023	0.01005	0.086567	-0.067152	0.011135	0.070864	-0.100996	0.144716	0.186692	0.150942	0.149189	-0.042623	0.013293	-0.231042	-0.069766	0.089543	-0.110436	-0.048	0.121472	0.081647	0.013106	0.007237	-0.109927	-0.022706	-0.198147	0.02754	-0.242526	0.242978	0.04008	0.0949
428377	MGC26694	Contig1115_RC	Hs.303669	0.0481314	-0.153807	0.057199	0.002731	-0.072128	-0.035197	-0.106296	0.036942	0.132509	0.170392	-0.013569	-0.121663	0.319949	-0.175635	-0.071234	0.098001	0.111654	0.098457	-0.087357	-0.122124	0.046387	0.036206	0.182082	0.142915	-0.063209	-0.206409	-0.0703	0.022602	-0.064584	0.019062	0.300508	0.106385	0.107319	-0.044544	-0.050884	-0.061272	0.000177	-0.248125	0.096519	0.046808	0.303216	0.017014	0.212005	0.013518	-0.150035	-0.076766
856174	PIK3R4	Y08991	Hs.306747	-0.0408642	-0.208609	0.043989	-0.086402	-0.116966	-0.021972	0.0154	-0.044557	-0.14944	0.115372	0.100773	-0.055759	-0.005135	0.014848	-0.067077	0.100338	-0.08214	-0.158535	0.143836	-0.037395	0.015061	-0.250386	0.00949	0.005154	-0.123115	-0.144024	0.095271	0.023795	0.040334	0.046258	0.101629	0.101843	-0.01502	-0.050769	-0.111352	-0.091899	0.089346	0.054226	0.112756	-0.072228	-0.145241	0.065639	0.073774	0.07865	0.159486	0.092906
461769	HLA-DRB5	AF005487	Hs.308026	-0.0439019	0.421996	-0.107041	0.193618	0.147267	-0.100246	-0.126132	0.20112	0.164484	0.042772	-0.382703	-0.366282	0.203359	0.085284	0.494585	-0.225845	-0.379591	0.008676	-0.126094	-0.271889	0.217343	-0.515464	0.482663	-0.53453	-0.444622	-0.194904	0.429458	0.041804	0.396215	0.14934	-0.275069	0.108325	-0.176468	-0.07037	-0.153469	0.099499	-0.410167	-0.210069	0.211073	0.342114	-0.042756	-0.258912	0.026793	-0.514072	-0.464021	-0.150684
49284		A_NM_004112__Contig49632_RC	Hs.31339	0.00588439	0.0967895	-0.0047595	0.0955815	-0.0022185	-0.0263125	-0.0062215	-0.231027	-0.136767	0.103447	-0.002139	0.025915	-0.039404	-0.0054445	0.042135	-0.102849	-0.007893	0.0560965	0.0314415	-0.03309	-0.023842	-0.100156	0.047474	0.017708	0.0218795	-0.144907	0.105272	0.087166	-0.0123185	0.0218655	-0.0426275	-0.0319865	-0.030628	-0.0331165	0.003306	0.101026	0.029377	-0.0046905	0.0531415	0.110966	0.0621235	0.015398	0.0869925	0.0436705	-0.002113	-0.0197775
234004	WSB1	NM_015626	Hs.315379	-0.0710821	-0.092343	0.026107	-0.0267	0.155541	-0.04374	-0.169388	-0.033534	0.110632	0.201495	0.044084	-0.154669	-0.099155	0.519056	0.009435	0.25659	-0.032739	0.136184	0.098218	0.228924	0.11757	0.108825	0.015949	0.050017	-0.142061	0.2344	0.443512	0.036078	-0.151316	0.109622	-0.064894	0.151361	-0.004952	0.046021	-0.009278	-0.136235	-0.177193	-0.034236	0.297576	0.100987	0.050456	-0.2478	-0.083464	0.029079	-0.065194	0.054216
1917716	NDRG1_A	A_NM_006096__Contig27182_RC	Hs.318567	-0.139158	-0.162699	-0.0334585	-0.158514	0.386675	-0.135342	-0.0214695	-0.0784295	-0.171824	-0.0431	-0.235247	-0.235818	-0.267232	-0.120163	0.010313	-0.119341	-0.169397	-0.133132	-0.094939	-0.19328	-0.193782	-0.167489	-0.043784	-0.200842	-0.107911	0.0409575	0.178073	0.210037	-0.168817	-0.104856	0.0473	-0.244414	-0.080289	-0.219533	0.0301395	0.163523	-0.411508	0.157979	-0.183416	0.0342775	0.121776	-0.431326	0.019791	-0.246001	-0.223297	-0.296743
204660	RTTN	AL117635	Hs.31931	0.0165367	-0.448321	-0.022662	-0.136517	0.156878	-0.137569	-0.020341	0.064682	-0.092158	0.315864	0.234905	0.02324	0.04014	0.283768	-0.016688	0.201305	0.110667	-0.102374	0.004751	-0.033474	0.003705	-0.169855	-0.163027	0.00024	0.192372	-0.568001	0.103881	-0.13258	-0.015065	-0.036465	-0.030102	0.203088	-0.063536	-0.011201	-0.038136	0.019778	-0.047052	-0.041694	0.2235	-0.165071	-0.159388	-0.250319	0.112186	0.117406	0.021664	0.163669
377452	JMJD1A_A	A_NM_018433__AB018285	Hs.321707	0.00390767	-0.057492	-0.118006	-0.133591	0.160739	0.0168725	-0.0001145	-0.105334	-0.17999	0.135052	0.0566715	-0.088218	-0.016881	-0.093738	0.0783405	0.197541	-0.138487	-0.134908	0.064178	-0.020938	-0.048587	-0.0268415	0.0302805	-0.072319	0.006972	-0.117879	0.33029	0.01634	-0.0404025	0.121965	-0.050605	0.096111	-0.03178	0.0889545	-0.16657	0.165447	0.0863825	-0.0945315	0.159582	-0.0265545	-0.024252	-0.102648	0.042332	0.203568	-0.0346455	0.140348
136919	CCL28	NM_019846	Hs.334633	0.0198353	-0.087864	-0.023966	-0.140785	0.067802	-0.133041	-0.159404	0.585938	0.210616	0.240275	0.051942	-0.076076	-0.204512	-0.117414	0.02083	-0.148733	0.011043	0.500468	0.001461	-0.03559	0.100672	-0.020742	-0.070378	0.072904	0.10623	-0.110328	0.152516	0.080327	0.367028	-0.152646	-0.107392	-0.071132	-0.07887	0.047006	0.167127	0.030634	-0.157827	-0.095018	-0.170588	-0.0248	0.048	-0.122048	-0.058621	0.222436	-0.098718	-0.158473
52422	SLC1A6	NM_005071	Hs.337391	-0.00694233	0.14408	0.155487	0.228266	0.022555	0.1346	-0.062829	0.138338	0.075297	-0.057556	0.030004	-0.030727	-0.001235	0.148694	0.099176	0.148968	0.019625	0.075631	0.03261	0.003952	0.104382	0.123066	-0.008314	0.082526	-0.011802	-0.020707	0.017754	0.045448	-0.026686	-0.057311	0.01653	-0.102688	-0.041386	0.000798	0.073301	0.011884	0.090273	0.077835	-0.04925	0.213524	0.096502	0.081712	-0.030117	-0.080719	-0.048003	0.071637
711698	BRCA2	NM_000059	Hs.34012	0.009552	0.163005	-0.217203	0.181861	0.191058	-0.0362	-0.29922	0.0697	-0.20606	0.173946	0.172715	0.291617	-0.024547	0.056335	0.017386	-0.065569	0.019929	0.094738	-0.014792	0.034961	-0.089623	-0.165034	0.015412	-0.010473	-0.008254	-0.125647	-0.025838	-0.007466	-0.000471	-0.049542	0.00841	0.002127	0.029517	0.027813	-0.038223	-0.015947	-0.062831	-0.051241	-0.036799	-0.09913	-0.252529	-0.032622	0.102425	0.103424	0.136166	0.079214
504421	ADFP	NM_001122	Hs.3416	-0.0522402	-0.300959	-0.183407	-0.124058	0.148998	-0.16673	0.076982	0.245111	-0.106327	-0.140814	-0.340965	0.053953	-0.011609	0.21647	0.505587	-0.044192	-0.247052	-0.183037	-0.082571	-0.171537	0.004031	-0.165224	0.049708	-0.292944	-0.023083	0.013964	0.320673	0.146539	-0.04751	0.148059	0.215742	-0.112951	0.008899	-0.261922	-0.427539	0.339489	-0.325008	0.105304	-0.221382	0.044797	-0.200092	-0.052868	0.047361	-0.179144	0.217569	0.095513
1630936	EXOSC4	NM_019037	Hs.343589	0.0276874	0.021576	-0.070879	0.002093	0.256783	-0.038484	-0.02725	-0.022068	-0.044658	-0.119641	0.017518	0.166439	0.089158	0.110811	0.020049	-0.169947	-0.122366	-0.080395	0.017798	-0.086305	-0.039193	0.094625	-0.055799	0.031174	0.075458	0.289249	0.054631	-0.057455	-0.004816	-0.058692	0.193976	-0.186124	-0.040283	-0.036921	0.21865	0.153055	0.004555	0.141586	-0.14392	0.059478	0.228592	-0.013231	0.200594	-0.15398	0.023957	-0.019903
383098	PRODH_A	A_NM_016335__NM_005974	Hs.343874	0.00812217	0.0836145	-0.0166615	0.100921	-0.0675885	0.037592	-0.0530635	-0.0347	0.006555	-0.0813065	0.0730605	-0.0211575	-0.0979555	0.025369	0.012932	-0.040661	0.0108375	-0.079733	-0.017818	0.04182	-0.050881	0.0120115	0.092986	0.002334	-0.012296	-0.0015615	-0.0006385	-0.0990545	-0.0224825	-0.018605	-0.025184	-0.027232	-0.007695	0.0422575	0.0366595	-0.01039	0.023986	-0.0268585	0.007675	-0.044306	0.01628	0.20488	-0.0591175	-0.0698875	0.029211	0.122242
269425	ZFHX1B_A	A_NM_014795__AF161345	Hs.34871	0.0192369	-0.108647	0.105507	0.047005	0.061	-0.066238	0.065219	0.101166	-0.119355	0.135682	-0.140307	-0.244321	0.0441455	-0.023252	0.0045125	-0.0761005	0.0047305	0.108504	-0.123494	0.0009845	-0.0066595	-0.0616915	0.0666075	-0.177375	-0.0127715	0.152858	-0.129049	0.181182	-0.019787	0.159244	0.0561935	0.130069	0.143173	0.100248	0.014564	-0.094235	-0.192788	-0.197742	0.164564	-0.00025	-0.0605435	-0.107629	-0.0724655	0.0741195	0.188479	-0.0031325
366815	SOX4	NM_003107	Hs.357901	0.0524401	0.285242	-0.152743	-0.112472	0.43089	0.050639	-0.045119	0.193914	0.256374	-0.070353	0.035576	0.279727	-0.076662	0.065033	-0.034517	-0.040825	-0.014337	0.056826	-0.083006	0.011022	-0.108645	-0.093177	-0.010493	0.085906	0.107636	0.184628	0.112291	-0.016083	0.078134	-0.020771	-0.027163	-0.072477	-0.035404	0.093923	-0.044212	0.143371	0.082587	-0.114359	0.047271	-0.063312	0.036842	-0.104006	0.073248	-0.07744	0.045446	0.093346
45512	LOC283666	AA608991_RC	Hs.359394	0.020381	0.177319	0.012573	0.754115	-0.008179	0.02274	-0.002606	0.064559	0.247786	-0.130294	-0.043773	-0.021549	-0.007509	0.003859	-0.021106	-0.085823	0.055043	0.058581	0.013667	0.010409	0.028092	0.25248	0.063743	0.03896	0.132539	0.09057	0.028609	-0.040361	-0.007637	-0.004611	0.07033	0.005696	0.04124	-0.006448	0.010962	0.014239	0.032605	0.05491	-0.070327	-0.05824	0.108902	0.056365	0.022284	-0.091997	-0.04704	0.107277
882434	KIAA0779_A	A_Contig46050__Contig52501_RC__Contig63482_RC__AB018322	Hs.362996	0.0132809	-0.0716925	0.0086455	-0.0587835	0.168931	0.0522415	0.0084565	-0.14815	-0.184951	-0.0477478	0.00940875	-0.147521	0.0713885	0.020876	0.0378032	0.0045665	-0.0308142	-0.0522235	-0.00932625	-0.0573085	0.00184175	-0.397522	-0.0562325	0.0382243	0.0775685	-0.016271	-0.0246772	-0.0228593	-0.0210415	-0.0443342	-0.0322385	-0.058768	-0.0273212	0.0342315	0.082088	0.0243085	0.0380843	0.0194658	-0.0058555	0.0423142	0.042496	0.0166645	0.0109152	0.083321	-0.066766	0.037537
162310	PMP22	NM_000304	Hs.372031	-0.03636	-0.490572	0.042556	-0.113628	0.546343	0.007561	0.209628	0.110954	0.02101	-0.163831	-0.250339	-0.184708	-0.210476	0.001668	0.620943	0.036187	0.20973	-0.043585	-0.415514	0.098406	0.192292	-0.380244	0.303073	-0.414033	-0.190917	-0.273749	-0.274172	0.052102	-0.221382	0.263192	0.232475	-0.138492	0.249787	0.02179	0.004242	0.240168	-0.000226	-0.231201	0.176877	-0.327056	-0.110506	-0.324625	0.108446	-0.103686	-0.184348	0.077351
219949		Contig44269_RC	Hs.37648	0.0513911	0.17544	-0.290517	0.240291	0.090005	0.068486	-0.295679	0.195589	0.047587	-0.067621	-0.134826	-0.123777	0.17829	0.252925	0.07562	0.092135	0.167123	0.089178	0.086364	0.071414	0.174817	-0.481822	0.006145	-0.009563	0.028713	-0.142711	-0.077518	-0.04148	0.09738	-0.036264	0.055917	0.064263	0.086911	0.166701	0.128848	0.084425	-0.018702	0.008204	0.173514	0.152829	0.075342	0.243724	-0.016239	-0.043228	-0.021578	-0.040832
2449679	PLXNB3_A	A_NM_005393__AB033032	Hs.380742	0.0242923	0.015503	-0.113655	0.022574	-0.0157625	-0.0523695	-0.0646855	-0.166011	-0.126572	0.153022	0.092512	-0.089141	0.221338	0.00527	-0.0592495	-0.11989	-0.0454875	0.0430545	0.302096	0.055559	-0.0480945	0.119376	0.04801	-0.0255475	-0.140867	-0.0987	0.221524	0.050592	0.0203365	-0.086702	-0.0031455	0.394221	-0.053873	-0.01166	0.029708	0.207461	-0.002238	0.264306	-0.02908	0.132384	0.20019	0.075739	0.253734	-0.0733775	0.0272	-0.044853
431280		Contig56534_RC	Hs.381220	0.084006	0.469461	-0.077678	-0.083616	0.064114	-0.133886	-0.123944	-0.095834	-0.083049	0.100248	-0.381064	-0.112215	0.138455	0.135452	-0.103367	-0.084024	-0.197199	-0.02173	-0.046252	-0.008537	-0.052348	-0.130003	0.237867	-0.083508	0.127502	0.239647	0.17753	-0.136728	0.134995	-0.134635	0.26188	0.09412	0.113808	0.104469	-0.02038	-0.061693	-0.101443	-0.003653	-0.09082	0.465622	0.025222	-0.2953	0.158671	-0.278261	-0.052558	-0.1244
45632	GYS1	NM_002103	Hs.386225	0.0393064	0.099198	-0.070433	-0.021717	0.084914	0.023569	0.046178	-0.0276	-0.015851	0.002412	0.040035	0.046101	0.045615	0.098248	0.143875	-0.084241	0.064554	0.011576	0.105187	-0.029966	0.059629	-0.008777	0.05687	0.001945	0.076386	-0.010572	0.067197	0.028534	0.076746	0.055803	0.058341	0.029966	0.040163	-0.037287	0.071853	-0.018869	0.025485	0.108231	-0.004206	0.132262	0.151228	0.121955	0.092432	-0.014962	-0.051019	0.09406
502151	SLC16A3	NM_004207	Hs.386678	-0.0947687	-0.401558	-0.247704	-0.193668	0.353225	0.023682	-0.072636	-0.343083	-0.160967	-0.284969	-0.541408	-0.164437	-0.346734	0.05477	0.140961	-0.674688	-0.210064	-0.154384	-0.182655	-0.221177	-0.097465	-0.226505	0.194614	-0.035066	0.395129	-0.172387	0.085005	0.248487	-0.165815	0.127944	-0.266646	-0.420421	0.117453	-0.202146	-0.195608	0.201821	-0.143265	0.211053	-0.19208	0.238504	0.145109	0.288789	0.269508	-0.834123	-0.073609	-0.038269
488505	SLC6A8	NM_005629	Hs.388375	-0.0672676	-0.111942	0.056225	-0.10202	0.002859	-0.070695	0.032738	-0.042123	-0.127913	0.053543	-0.377074	-0.036177	0.011955	-0.008579	-0.001079	-0.123333	0.08763	-0.074019	0.062638	0.217566	0.027622	0.065422	0.086404	-0.089441	-0.247402	-0.014866	-0.154839	0.130726	0.028103	0.001139	0.104156	-0.109391	-0.068989	-0.229622	0.116617	0.087026	0.07308	0.082063	-0.179026	-0.131015	0.124471	0.257374	-0.078422	-0.130095	-0.13483	-0.161469
809569	WASPIP_A	A_NM_003387__Contig46778_RC	Hs.401414	0.0128796	0.147458	0.0565235	0.193307	0.2224	-0.033896	-0.140427	0.163177	0.12626	0.086314	-0.048234	-0.0261745	-0.0622295	0.0447965	-0.034352	-0.117862	0.007055	0.033002	-0.0030945	0.0098665	0.031938	0.0059845	0.097419	0.0141835	-0.0277145	0.163371	0.106957	0.058576	0.102073	-0.019354	0.13683	0.0073895	0.0644525	0.017085	0.010726	0.012145	-0.0158975	0.0118085	0.037316	0.22045	0.007099	-0.0042565	0.002248	-0.133883	0.0901125	-0.0619205
487371	FBXO32_A	A_Contig56270_RC__Contig57076_RC__Contig50592	Hs.403933	-0.125716	-0.128683	0.0587013	-0.167563	0.504121	0.225272	-0.033572	0.367489	-0.104089	0.00772033	-0.386609	-0.156162	-0.389838	-0.0379223	0.0523	-0.0845633	-0.162294	-0.2239	-0.365984	0.0344407	0.0162267	-0.362109	0.124624	-0.332612	-0.300583	0.277692	-0.048431	0.108129	-0.131211	0.109684	-0.130049	0.0434207	-0.0476317	0.123303	0.253317	0.147116	-0.025913	0.036125	-0.184867	0.149915	-0.176324	0.037571	0.117362	0.077498	-0.239806	-0.304793
595318	SLC6A3	NM_001044	Hs.406	-0.00562689	0.055664	-0.002771	0.117476	-0.053988	0.062758	-0.052931	0.031317	0.092081	-0.112512	-0.054379	0.029598	0.00778	-0.041742	0.039234	-0.00259	-0.001108	-0.048283	0.053292	-0.069428	0.004131	0.098106	-0.029763	-0.075579	0.042263	-0.085558	0.023082	-0.033759	0.028638	-0.06991	-0.004942	-0.034598	0.00374	-0.022481	-0.06985	-0.068885	0.00792	0.579144	-0.576658	-0.004707	0.004088	0.062471	-0.06077	-0.062456	-0.019943	0.065625
1637282	HK2	NM_000189	Hs.406266	0.0675644	-0.009178	-0.115478	0.078082	0.237594	0.33508	-0.075875	0.024432	0.493504	-0.12613	-0.031411	0.223498	0.025375	0.032487	0.083791	-0.135255	0.041071	0.06896	-0.011427	-0.006808	-0.098682	0.021058	-0.016111	-0.069781	0.143536	0.058321	0.017633	0.084629	0.282412	-0.06529	0.021726	-0.037109	-0.026369	-0.003531	-0.011543	0.07518	0.011223	0.042319	-0.022557	0.074277	-0.03206	-0.036904	0.103958	0.118365	0.012174	0.205543
741474	GPI	NM_000175	Hs.406458	0.0126013	0.131844	-0.073633	-0.097432	0.205197	0.169832	0.06461	-0.181242	0.06157	-0.278497	-0.190292	-0.075278	0.216885	0.136867	0.036632	-0.34349	0.143807	0.001423	0.262372	0.013684	0.058805	0.063483	0.193937	-0.0373	0.14463	0.126904	-0.037102	0.032554	0.034757	0.01546	0.10033	-0.066795	-0.005275	-0.275307	0.007299	0.161948	-0.012359	0.412842	-0.207862	-0.032994	0.16167	0.12063	0.133609	-0.227422	0.131347	0.035078
454930	NAV2	Contig40599_RC	Hs.407934	-0.00299567	-0.002936	0.257009	0.115973	0.061669	0.044974	0.077576	0.143756	0.059916	0.147138	-0.029092	0.044131	-0.022091	0.078373	-0.010785	0.123598	0.076305	0.202221	-0.024838	0.242566	0.086038	0.250461	-0.044489	0.075621	0.026611	0.282649	-0.062551	0.019964	-0.068414	0.004698	0.120567	-0.112192	0.022161	-0.004692	0.166898	-0.007819	-0.025655	0.044524	-0.056445	0.03486	0.206007	0.031035	-0.039639	-0.136283	-0.019329	-0.188783
171916	CNTNAP1	NM_003632	Hs.408730	-0.0127668	0.159995	0.172289	0.203001	0.510204	0.026977	0.047942	-0.077913	0.244259	0.062815	-0.057774	0.060964	0.022768	0.150634	0.03366	0.1923	0.039684	0.249937	0.00222	0.231083	0.198246	0.23897	0.042848	0.156377	-0.026727	0.088466	-0.024741	0.058853	0.035768	-0.033905	0.120203	-0.098171	-0.012057	-0.013197	0.132315	0.026301	0.079601	0.04282	-0.006581	0.285287	0.105474	0.112258	-0.060239	-0.119495	-0.013332	-0.070781
263013	PLOD2	NM_000935	Hs.41270	0.00428611	-0.150291	-0.362772	-0.375943	0.570278	-0.335887	-0.087973	-0.466714	-0.374949	-0.267378	-0.173739	-0.608263	-0.113613	-0.238305	0.165148	-0.196346	-0.180599	-0.105596	-0.031499	-0.052325	-0.096218	-0.209956	0.082445	-0.143082	0.051336	0.147007	0.089879	0.162724	-0.074824	0.001839	-0.014923	-0.066651	0.01947	0.008196	-0.144353	0.016559	0.132389	-0.175152	-0.018654	-0.029758	-0.056185	0.097783	0.234027	-0.043964	0.083424	0.204222
244307	SERPINE1_A	A_NM_000602__M16006	Hs.414795	-0.0938327	-0.389597	-0.104157	-0.154372	0.143199	-0.149316	-0.170345	-0.377555	-0.0965045	-0.357466	-0.251011	0.224938	-0.382953	0.207567	0.102298	-0.11111	0.001085	-0.0354005	-0.0186985	-0.128185	-0.229691	0.123098	0.049711	-0.240604	-0.104786	-0.096808	0.379213	0.266536	0.0735435	0.221087	-0.142533	-0.0165495	0.219539	-0.232821	-0.0381255	-0.139594	0.12024	0.141181	0.137546	-0.0750805	0.0586225	-0.338965	-0.001639	-0.587551	0.348512	0.026472
714437	SEMA4B	Contig1386_RC	Hs.416077	-0.144547	-0.191379	0.05522	-0.063868	-0.335299	0.251247	0.218175	-0.126092	-0.091023	-0.158925	0.176085	-0.243391	-0.144093	-0.04466	0.020529	0.118351	-0.053285	-0.150008	0.256262	0.186092	-0.018801	-0.04514	-0.051182	0.210134	-0.071062	-0.327321	0.017707	0.324925	-0.324309	0.2456	-0.269664	0.211841	-0.106317	-0.229699	-0.077517	-0.13455	0.389885	0.600607	-0.076049	-0.192387	0.063237	0.234915	-0.436118	-0.122805	-0.049486	0.095905
129332	MEG3	NM_018514	Hs.418271	-0.102382	0.398639	0.619794	0.091564	1.05749	0.271101	0.428763	2	0.328429	-0.09315	0.299175	0.072275	-0.261449	-0.213573	-0.201208	-0.155914	0.057279	0.07616	-0.014477	0.090166	0.070557	0.361398	-0.00877	0.008312	-0.321405	0.293249	-0.188816	0.13652	0.039906	-0.021515	0.000114	0.050993	-0.001315	-0.00297	-0.090072	-0.079488	-0.037177	-0.101967	-0.105623	-0.030567	-0.027391	0.011822	-0.105218	-0.193438	0.027917	0.058778
753467	SLC2A3	NM_006931	Hs.419240	-0.00973811	-0.204744	-0.032582	-0.129502	0.263797	-0.227115	-0.05858	-0.044711	-0.161152	-0.01086	0.077545	-0.0925	-0.082283	0.05113	0.286093	-0.146116	-0.220513	-0.001816	-0.041407	-0.069161	-0.013611	-0.16291	0.123413	-0.215971	-0.067501	-0.294661	0.314813	0.27736	-0.103677	0.133911	0.026734	0.120732	0.253118	-0.132722	0.01381	0.007517	-0.266825	-0.073193	0.264926	0.183869	0.05904	-0.177367	0.265721	-0.256521	-0.130321	0.078147
79629	CXCR4	NM_003467	Hs.421986	0.0144068	-0.170098	-0.150033	-0.103069	0.19286	-0.182653	0.263188	-0.008948	-0.16554	0.113474	-0.461087	-0.023796	-0.172179	-0.099516	0.226358	-0.363716	-0.461705	-0.303385	0.038047	-0.145837	-0.191728	-0.347624	0.076259	-0.492567	-0.086433	-0.226505	-0.074744	0.052911	0.153889	0.017184	0.121395	0.237555	0.32093	-0.176365	-0.264833	0.032273	-0.134819	-0.100078	0.09801	0.194394	0.030761	-0.486696	0.306563	-0.289616	0.00694	-0.083027
2283783	CRA	NM_006697	Hs.425144	-0.0228952	0.070948	0.054086	0.108138	0.094119	0.07613	-0.023331	-0.014118	-0.064757	0.005267	-0.014106	0.069577	-0.16102	0.006583	0.236272	0.009771	0.097821	-0.079789	-0.028571	0.064871	0.101821	-0.059581	-0.029956	0.039436	0.00115	-0.102834	0.109711	-0.043668	-0.063128	0.039757	-0.038456	-0.058726	0.018172	-0.034118	0.02523	0.010644	0.028295	-0.028537	0.063264	0.020518	0.035435	0.116314	-0.026043	-0.055662	-0.105039	-0.076278
66715	PPP5C	NM_006247	Hs.431861	0.00435122	0.05548	0.097871	0.020748	0.57096	0.27522	-0.242479	0.17728	0.448767	-0.056522	0.018234	0.019114	-0.012997	0.009635	-0.102999	-0.117652	0.021206	0.195069	0.038338	0.079974	0.061481	0.117784	0.082663	0.034488	0.022447	0.141148	0.044599	0.062013	0.035365	-0.04412	0.054722	0.033049	-0.055651	-0.045148	0.063745	0.038002	0.008358	0.068609	-0.022158	0.115691	0.085578	-0.075209	0.049826	0.012418	0.029104	0.002788
1521706	JAG2_A	A_NM_002226__Contig51202_RC	Hs.433445	-0.00882644	-0.002881	0.058075	-0.132288	0.451244	0.137578	-0.0777155	0.374185	0.180211	-0.004573	0.0049895	0.0078925	-0.0507045	0.097054	-0.0333245	-0.111838	0.101972	0.386081	-0.010679	0.176247	0.2116	-0.020829	0.044636	0.143459	-0.061776	-0.850928	-0.0789965	0.029106	-0.0844015	0.014762	0.161298	-0.086367	0.134558	-0.0713845	0.174506	0.0881925	-0.0389985	0.0078535	-0.0810745	-0.117035	0.13611	-0.0995465	0.066701	0.0529275	-0.0060475	-0.23365
1645668	PDK1	NM_002610	Hs.433611	0.0380602	0.156763	0.125734	0.059988	0.682731	0.033171	-0.105731	0.095188	0.037763	0.002933	-0.033043	0.038927	0.097294	0.039881	0.007919	-0.0966	-0.028807	0.063982	0.109331	0.006933	-0.031964	-0.036501	0.045155	0.028306	-0.03157	0.167664	0.303054	0.119882	0.153294	-0.076649	0.016093	0.044793	0.013143	0.060856	5.5e-05	0.114757	0.030003	0.059379	0.058855	0.372334	0.124194	0.035012	0.07393	0.14027	0.029177	0.009787
42906	MPP2	NM_005374	Hs.436326	0.00317522	-0.064045	-0.091176	0.101604	0.041876	0.032545	-0.026198	-0.020415	0.201456	0.234608	0.382635	-0.171385	-0.015414	0.11593	-0.03135	-0.012206	0.088761	0.109939	-0.023326	0.054646	0.026616	-0.02551	0.013006	0.169255	-0.000639	-0.13238	0.142521	0.332683	-0.003859	-0.015571	-0.014457	-0.001949	-0.038707	0.015414	0.050208	0.023679	0.018151	0.0883	0.036979	0.023707	0.103025	-0.043877	0.050174	0.034957	0.017722	-0.005881
595078	BHLHB3_A	A_Contig50565__Contig2710_RC	Hs.437282	0.0568979	-0.137692	0.06874	-0.0539475	-0.0549225	0.0193175	0.076351	0.235576	-0.0381835	0.003827	-0.123115	0.0152185	-0.185395	-0.10452	0.0203585	0.0026215	-0.074764	-0.0794085	-0.256196	-0.0145525	-0.0501395	-0.151894	0.150032	-0.059711	0.165058	-0.372535	-0.105173	0.0026115	0.188819	0.089822	-0.113599	-0.0638945	0.163863	0.033231	-0.0709045	0.0615735	0.0716155	-0.114176	0.159738	-0.0578645	-0.084321	-0.311154	0.172623	0.010316	0.039138	0.0792955
704049	LPIN2	NM_014646	Hs.437425	0.0682633	0.031867	-0.096569	-0.224885	0.045478	-0.072012	0.017185	-0.081538	0.168211	0.14599	0.113081	-0.202959	-0.111273	-0.008732	-0.046052	0.044401	0.09721	0.047208	-0.124809	-0.050708	0.103452	-0.081354	0.162654	-0.089568	0.357956	-0.2644	0.025381	0.095437	0.210769	0.030564	-0.017439	0.035043	0.078891	0.090118	-0.108489	0.042818	-0.186664	-0.196184	0.062392	-0.097298	-0.183264	-0.298316	-0.004491	0.062383	-0.071311	0.082145
746007	FLJ10415	NM_018089	Hs.437647	-0.0424198	-0.104649	-0.038927	0.099644	0.105451	0.025405	-0.000841	-0.034811	0.003788	0.041218	0.096847	-0.019901	0.002633	0.076413	0.003795	0.099781	0.010895	0.003891	0.037099	0.04244	0.060167	-0.124479	-0.037072	-0.07567	-0.18379	-0.108247	0.204191	-0.134771	-0.077369	0.014485	0.170918	0.190979	-0.157754	-0.152029	-0.10283	0.037944	0.061157	0.167086	0.010928	0.132827	0.03779	0.103319	0.166168	-0.057716	0.014639	-0.052641
220658	MSH2	NM_000251	Hs.440394	-0.0129786	0.016818	-0.287271	-0.188494	-0.038605	-0.261724	-0.034265	-0.094931	-0.147052	-0.029371	-0.019604	-0.101102	-0.051444	-0.178073	0.014616	0.246196	-0.139645	-0.069452	0.112747	-0.129954	-0.213296	0.026125	0.124115	-0.13868	0.289055	-0.222628	0.000899	-0.032609	-0.080603	-0.154235	0.225912	0.104442	-0.077176	-0.014923	-0.295353	0.127105	0.023584	-0.152791	-0.267794	0.332322	-0.28492	-0.078373	0.06181	-0.032704	0.057124	0.021562
165921	CEP2_A	A_NM_007186__Contig33602_RC	Hs.440606	-0.00441783	0.0588985	-0.185223	0.0401145	0.05618	-0.123912	-0.133016	-0.0636555	0.128076	0.038913	0.079321	-0.028531	0.032026	-0.014536	0.018545	0.058757	0.22954	-0.0609265	0.107239	0.031258	0.022894	-0.042086	-0.0094745	0.0060575	0.0525415	-0.15794	0.0392445	0.0061945	0.019095	-0.050644	0.014742	0.010526	-0.0542535	-0.0304055	0.00983	0.0042085	-0.0415675	0.329639	0.0314705	0.113254	-0.02428	-0.035751	-0.078977	-0.135756	0.017628	0.0204295
774446	ADM	NM_001124	Hs.441047	-0.284719	-0.831943	-0.481003	-0.435759	0.585237	-0.797659	0.092189	-0.157212	-0.566428	-0.510618	-0.736696	-0.448204	-0.193754	0.214079	0.382207	-0.464197	-0.717238	-0.503909	-0.247061	-0.525611	-0.287886	-0.451894	0.294291	-0.681928	0.684669	-0.540124	0.443811	0.274393	-0.678117	-0.062476	-0.001593	0.265105	-0.154313	-0.686875	-0.163747	0.30123	-0.574548	0.234253	-0.38837	-0.091866	-0.352427	-0.141188	-0.079248	-0.731945	-0.212628	-0.04956
51843	PIAS2	Contig21098_RC	Hs.441069	0.0190044	-0.021866	-0.164906	0.060733	-0.643873	-0.129359	-0.116401	-0.062738	0.031742	0.018846	0.102471	-0.179611	0.207223	-0.099394	-0.041398	0.085798	0.058194	-0.100756	0.091277	-0.085047	0.002952	0.182357	-0.130855	0.017024	-0.005222	-0.186927	0.172967	0.103729	-0.109932	-0.01581	-0.144746	-0.009049	0.115813	-0.097499	0.031009	0.044249	0.033445	0.054696	-0.069643	0.08793	0.175732	-0.075419	0.079846	-0.051517	-0.000877	-0.075284
1570311	FAM13A1	NM_014883	Hs.442818	0.0623006	-0.092823	-0.156474	-0.244833	0.21407	-0.037842	-0.01753	0.303665	0.060956	0.143796	-0.065781	-0.122266	0.122115	-0.108591	0.158289	-0.054034	-0.077433	0.016668	-0.088101	0.153035	0.019793	0.044744	-0.029779	-0.103553	-0.246146	-0.052214	0.04368	0.056566	0.378469	-0.004163	-0.077639	0.314186	-7.5e-05	0.218425	-0.026228	0.025236	-0.108388	0.159726	0.063213	0.036576	-0.017236	-0.441765	0.059085	0.101887	0.01444	-0.051298
929934	DST	AB018271	Hs.443518	-0.0479689	-0.254611	-0.025288	-0.287313	-0.106125	0.023898	-0.025099	0.212062	-0.16053	0.217809	-0.190179	-0.090535	0.115115	-0.204571	0.279099	0.133655	-0.2349	-0.080057	-0.305275	-0.165033	-0.225776	-1.42588	-0.35785	-0.178813	-0.461383	-0.490061	-0.211856	0.084265	-0.407949	-0.051091	-0.35095	0.547993	-0.139084	0.666462	0.015445	-0.143156	-0.161933	-0.526631	-0.291896	-0.341004	-0.376963	-0.401583	-0.169162	0.357334	-0.079893	-0.111775
122982	EGLN3	Contig38674_RC	Hs.443906	-0.0644116	-1.40578	-0.171374	0.18846	0.124539	-0.025099	0.262906	-0.084574	-0.185	-0.060295	-0.176423	-0.256215	0.088742	0.329475	0.595964	0.097989	-0.184354	-0.037766	0.381223	0.027767	-0.141368	-0.031659	0.049834	-0.028117	0.148282	-0.203212	0.545267	0.305724	-0.142336	0.135914	-0.105532	-0.089475	-0.101277	-0.211578	-0.092654	0.122174	-0.097997	0.221252	0.063287	-0.215886	-0.051345	0.019011	0.017498	-0.421572	0.064951	0.23344
461759	OLR1	NM_002543	Hs.445299	0.0161834	-0.062542	-0.376446	-0.211519	-0.364103	0.067496	0.19136	0.005508	-0.202094	-0.190126	-0.36591	0.020389	-0.20716	0.018443	0.225784	-0.271459	-0.043147	-0.091167	-0.007358	0.004539	-0.118552	-0.596172	0.215455	-0.033899	-0.085402	-0.075114	0.122146	-0.004305	0.093641	-0.02788	-0.144387	-0.071629	0.038661	0.048297	-0.139284	0.075025	0.060047	0.009179	-0.063236	0.093068	0.107929	-0.078939	0.034976	-0.220524	-0.069736	0.035085
725677	PCTK3_A	A_X66362__AL161977	Hs.445402	-0.0789336	-0.196277	-0.198392	0.025791	0.141783	-0.137015	-0.0667395	-0.068872	0.035488	0.171653	0.049393	-0.141558	0.0752775	-0.0935155	-0.026856	-0.23418	-0.0420235	0.133336	-0.256234	-0.0330265	0.067396	0.15922	-0.0499325	-0.17537	-0.0638955	-0.081653	0.203288	-0.201684	-0.152232	-0.0661625	-0.079081	-0.18976	-0.0961205	-0.221891	-0.0933145	-0.082328	0.04108	0.0897495	-0.223527	0.232146	-0.0159465	0.26197	0.150942	-0.120588	-0.0995015	-0.215879
197651		Contig42328_RC	Hs.446589	-0.0143727	-0.587723	-0.282079	-0.519601	0.363248	-0.569337	-0.518726	-0.577923	-0.61216	-0.544111	-0.096998	-0.391778	-0.245438	-0.098253	-0.199538	-0.46429	-0.202579	-0.08776	0.032084	-0.193072	-0.353851	0.69889	-0.436572	-0.038924	0.320516	-0.12836	0.327709	0.209571	-0.450959	-0.213012	-0.180344	-0.030549	0.378962	-0.226767	0.273092	0.293293	0.16849	0.035626	0.046898	-0.05595	-0.481036	-0.064606	-0.170558	0.771928	-0.38184	-0.142342
1581582	ZNF292	AB011102	Hs.448341	-0.0931663	0.108009	-0.101332	-0.17284	-0.018634	-0.184786	-0.056124	0.200687	-0.284285	0.204818	-0.187946	-0.255373	-0.115049	-0.192429	0.014128	0.274198	-0.013828	0.151281	-0.075261	0.034672	-0.343927	-0.149808	-0.021133	0.048223	-0.06989	0.040977	-0.094422	0.109475	-0.192905	-0.233645	-0.093085	0.428647	-0.005907	0.308322	0.009492	0.356819	-0.34463	-0.502039	-0.259617	-0.311292	-0.384639	-0.131228	-0.299752	0.198436	-0.118647	-0.110546
898218	IGFBP3	NM_000598	Hs.450230	0.0171446	0.004652	0.004577	0.044903	0.080679	-0.011065	-0.011124	-0.003784	0.064547	-0.110063	-0.112138	0.023333	0.00195	0.081242	0.330701	0.013367	-0.074404	-0.006435	-0.000643	-0.012784	0.024683	0.093623	0.103463	-0.079877	-0.059954	0.029187	0.315489	0.175681	0.07453	0.040876	0.09426	-0.003721	0.074403	0.001046	0.081939	-0.006225	-0.006941	0.143776	-0.018681	-0.028087	0.000497	-0.016892	0.068402	-0.078841	0.007611	0.127587
626773	PLEKHA2	Contig3015_RC	Hs.470847	0.0234208	0.004791	0.073782	0.039447	-0.086354	-0.053354	0.064977	0.108423	-0.038448	0.327897	-0.009949	-0.107739	-0.055733	-0.027123	0.098678	0.008592	-0.08523	0.025115	-0.046342	-0.002531	0.007995	-0.199939	0.12494	-0.203356	0.12285	-0.066464	0.209811	0.004582	0.045675	-0.045261	0.219325	0.133885	0.072067	-0.004043	0.084935	-0.00889	-0.090205	-0.200533	0.143883	0.291746	0.049421	0.014974	-0.085024	-0.141944	-0.053667	-0.109009
714493	FNBP2_A	A_AK000885__Contig38681_RC__AB007925	Hs.5003	-0.021319	-0.168403	0.0661493	0.0403847	0.181304	-0.103962	0.145744	-0.440876	-0.0986677	0.125963	-0.0395923	-0.116407	-0.0528123	0.232609	-0.00249533	-0.228111	0.0329197	-0.187334	-0.097969	-0.0338523	0.131902	0.0233687	0.106514	-0.146041	0.0219437	0.0159637	0.118236	0.072404	-0.0340347	0.0532117	0.012742	-0.0963477	0.00956833	-0.140207	-0.0771663	0.094802	-0.124657	0.0638313	0.136832	0.116658	-0.00211	0.190982	0.0607143	-0.172245	-0.0144473	0.359121
843046	MKNK2_A	A_NM_017572__AL137615	Hs.512094	-0.1066	-0.046051	0.100425	-0.133479	-0.201302	0.209354	0.303809	0.0008465	0.013863	0.0083255	0.0879905	-0.042923	-0.177598	-0.306152	0.0233645	0.0262955	0.355359	0.234061	0.0552875	0.234253	0.179387	0.249632	-0.088884	0.317956	-0.184057	0.053725	-0.199554	0.040879	-0.190552	0.0506625	-0.163315	-0.117359	-0.021629	-0.172587	0.16672	-0.074681	0.21806	0.24609	-0.2003	-0.0581645	-0.0201505	0.0919015	-0.143034	-0.107379	-0.143528	-0.043336
757462	E2IG5	NM_014367	Hs.5243	-0.0939337	-0.142565	-0.021212	-0.000596	0.051128	0.164087	0.113834	-0.041421	-0.128565	-0.069424	-0.339285	-0.09375	-0.239314	-0.107019	0.167347	-0.038436	0.051201	-0.019121	0.071387	0.02435	-0.025639	-0.159348	0.070634	0.075313	-0.182392	0.056881	0.069758	0.053087	-0.03704	-0.027364	-0.271309	0.085296	0.002735	0.137336	-0.052204	-0.135333	0.208142	-0.245708	-0.012896	-0.214132	-0.010891	0.027718	0.06822	0.026251	-0.228356	-0.170717
130858	FAM29A_A	A_NM_017645__Contig42505_RC	Hs.54617	0.00857194	-0.0103155	0.0302765	-0.0655345	-0.235032	-0.076669	0.013195	-0.027484	-0.0363745	0.137655	-0.0913755	0.089849	0.0469895	-0.049276	-0.0018125	0.104596	-0.007313	0.0018915	-0.0368325	-0.028328	-0.0777665	-0.167234	-0.003373	0.0122825	0.010665	0.307162	0.081825	0.0809345	-0.051072	-0.094891	0.142546	0.016154	0.0390695	0.0586395	-0.0137965	0.219701	-0.109034	-0.0416875	-0.03798	0.125298	-0.161572	-0.092464	-0.003424	0.098907	-0.0102655	0.12336
1643566	CA9	NM_001216	Hs.63287	-0.403902	-0.508817	-0.603043	-0.438227	0.010334	-0.484642	-0.199709	-0.43408	-0.765701	-0.434132	-0.458297	-0.394431	-0.608243	-0.057445	0.345763	-0.648733	-0.532393	-0.600995	-0.416812	-0.383789	-0.481898	0.442226	0.174976	-0.512166	-0.094519	-0.733954	0.281291	0.263596	-0.783562	0.114895	-0.251498	-0.599066	-0.001352	-0.696102	-0.360958	0.070233	-0.230831	0.179025	-0.558574	0.332905	-0.183785	-0.071221	-0.046729	-0.476745	-0.570433	-0.240998
51344	C14orf132	AK001590	Hs.6434	-0.0525142	0.001231	0.005624	0.490937	-0.130687	0.037959	0.078133	0.028468	-0.172761	0.071243	-0.192306	-0.137506	-0.239347	-0.025815	0.10438	-0.169231	0.081326	-0.105114	-0.177428	0.040082	0.334697	0.04952	-0.119314	-0.043083	-0.100232	0.253594	-0.225863	0.031565	-0.174009	0.180588	-0.17417	-0.096606	0.14321	0.08392	0.247799	-0.110163	-0.1412	0.279089	-0.019896	-0.255243	0.093218	0.039912	-0.19219	-0.056323	-0.007578	0.083095
48626	INSIG2	AL080184	Hs.7089	0.0392277	-0.394855	-0.002229	-0.122425	0.138182	-0.014528	0.236591	0.033378	-0.147744	0.04771	-0.090541	-0.241311	-0.20612	-0.151549	0.059484	0.063705	-0.333323	-0.206904	0.140164	-0.15501	-0.203755	-0.335031	-0.042794	-0.314562	0.171166	-0.354274	-0.073426	0.128457	0.074236	-0.049886	-0.040704	0.385734	0.017551	0.233064	-0.239857	0.045375	-0.115283	-0.178802	0.136987	-0.034106	-0.052617	-0.172999	0.012993	0.160516	-0.050123	0.15217
841664	CAV1_A	A_NM_001753__AF070648	Hs.74034	-0.0706069	-0.35786	0.187273	-0.0657625	0.148445	-0.017216	0.0947275	0.36226	-0.261402	0.010145	-0.0980815	-0.100557	-0.0977795	-0.033642	0.022754	0.146079	-0.133871	0.099577	-0.281859	0.0147995	0.031762	-0.074968	0.0133905	-0.221993	-0.279555	-0.243757	-0.148286	0.108382	-0.224896	0.0355965	-0.158381	-0.073493	0.077974	0.14126	-0.060912	-0.0781015	-0.112976	-0.398481	0.147311	-0.226083	-0.276016	-0.224704	-0.024386	0.216751	0.147348	-0.101403
771323	PLOD	NM_000302	Hs.75093	0.0326534	-0.119392	-0.018931	0.034379	0.566569	0.019863	-0.011791	-0.044323	-0.097155	-0.053949	-0.100602	-0.019805	-0.051825	-0.065005	0.213545	-0.266667	0.056024	-0.005437	0.097232	0.008453	0.07094	0.049847	0.077754	-0.112236	0.015186	-0.110668	0.151465	0.156262	-0.023109	0.112196	0.048324	-0.128851	0.158917	-0.150283	-0.004833	0.366711	-0.026071	0.138037	0.022199	0.218064	0.014627	0.07872	0.385016	-0.125462	-0.100167	-0.024995
51532	ARL6IP	D31885	Hs.75249	0.015584	0.084823	-0.081006	-0.154467	0.002551	-0.110956	0.032156	-0.156958	0.063015	-0.038319	-0.021713	0.143995	0.15793	0.291686	0.186985	-0.093048	-0.138889	-0.187021	0.02706	-0.190474	-0.089169	-0.107714	-0.042341	0.017412	0.194588	-0.172387	-0.16191	-0.271311	0.059009	-0.206192	0.122037	-0.008124	-0.148387	0.035474	-0.063331	0.014748	-0.013774	-0.099892	-0.224336	-0.070484	0.017678	0.02232	-0.08473	-0.011551	0.066898	-0.182515
838802	P4HA1_A	A_NM_000917__Contig19530_RC	Hs.76768	-0.1043	0.007585	-0.01061	-0.160936	0.041135	-0.0938795	0.118979	-0.321746	-0.459943	-0.200892	-0.229348	-0.224018	-0.150436	-0.0604725	-0.0113615	-0.333469	-0.124213	-0.223161	0.206652	-0.090456	-0.006506	0.086869	0.120212	-0.0689555	-0.122012	0.032543	0.151835	0.253653	-0.170675	-0.01646	-0.204659	-0.105	0.0686785	-0.046294	0.154506	0.122894	-0.0103645	0.074504	-0.0174965	-0.248855	0.319213	0.019929	-0.166153	-0.007251	-0.11549	-0.0115335
1420501	THOP1	NM_003249	Hs.78769	-0.0703028	-0.09825	0.11059	0.034748	0.077245	-0.071994	0.075087	-0.081046	-0.176527	-0.217882	0.11634	-0.146709	-0.102605	-0.158909	-0.142086	-0.044825	-0.106619	-0.146882	-0.197534	-0.153878	0.115656	0.128631	-0.27009	-0.053809	-0.024332	0.041089	-0.118669	-0.130462	-0.258449	-0.059741	0.061677	-0.036452	-0.11641	-0.255127	-0.152951	-0.161817	-0.064754	0.492593	-0.226299	0.050001	-0.081647	0.447525	0.066767	-0.558141	-0.159115	0.057067
949939	PGK1_A	A_S81916__NM_000291	Hs.78771	0.00140817	0.033774	-0.059146	-0.142989	0.128543	-0.0459125	-0.0586025	-0.0964455	0.0319565	-0.129239	-0.068836	0.0325825	0.0240735	0.12893	0.076097	-0.135488	-0.075046	-0.045977	0.133187	0.013413	-0.051273	0.06412	0.05828	-0.012199	0.16543	0.0023865	0.198184	0.241665	0.053661	0.0343545	0.0987295	0.0006175	0.026608	-0.091923	-0.026617	0.044313	-0.014095	0.117127	-0.0861515	-0.053745	-0.040636	-0.0107475	-0.005111	-0.188111	-0.027334	-0.015326
1881104	GNRH1_A	A_NM_000825__Contig40036_RC	Hs.82963	0.0539031	0.04716	0.075756	0.060203	-0.134273	0.0403605	0.260065	0.0684695	0.042144	0.170393	-0.0271915	0.0312355	0.118161	-0.020539	-0.049627	-0.156709	-0.0418035	-0.032772	0.00541	0.000111	-0.096092	-0.0406115	0.0247395	-0.0795325	0.0664915	0.0428245	0.026252	0.008526	-0.008978	0.032329	-0.0172975	0.0536815	0.018752	0.060897	-0.0788965	-0.06206	-0.005296	-0.0458835	-0.015284	-0.109813	0.086384	-0.0722235	0.096417	0.145285	-0.0103265	0.136317
47481	CLECSF2	NM_005127	Hs.85201	-0.0207841	0.353546	-0.339396	-0.010196	-0.008706	-0.546539	0.186492	0.173745	-0.304114	0.196577	-0.258545	-0.233576	-0.296305	-0.225924	0.156123	0.072007	-0.230648	0.10733	-0.148219	-0.012102	-0.201708	-0.365813	0.126768	-0.050669	-0.093089	-0.000627	-0.164779	0.042866	0.009426	-0.055463	-0.03649	0.234371	0.148249	0.395528	-0.130119	0.013271	-0.316321	-0.374239	-0.183273	0.082657	-0.230992	-0.237306	-0.070589	0.170622	-0.049799	0.003489
824933	NF1_A	A_NM_000267__AF055023	Hs.93207	-0.0340264	0.0620605	0.089079	-0.0409345	0.111393	0.0676475	-0.033976	0.069254	0.137037	0.143755	-0.025411	0.002386	-0.108474	-0.0470595	0.038807	0.016296	0.0120275	-0.0810295	0.145727	0.0484695	-0.0181145	-0.004466	0.0292015	0.0202745	-0.082923	-0.152134	0.216881	0.0195655	-0.0360475	0.0103035	0.0098005	-0.0549045	-0.0337335	0.0038725	-0.003887	0.042356	0.034827	-0.060212	-0.00972	-0.161807	-0.061547	0.063404	-0.0546685	0.0659365	0.023139	-0.039239
137554	C10orf10	NM_007021	Hs.93675	-0.00608089	-0.175769	0.157045	0.106133	0.204714	0.256476	-0.105527	0.195064	0.226624	-0.035977	0.006305	-0.001065	-0.105755	0.076886	0.014615	0.045663	-0.065311	0.244741	-0.081461	-0.023864	0.049887	-0.035416	0.136164	-0.197155	-0.033603	0.158765	-0.046116	0.118036	-0.018166	0.087664	0.056679	-0.009461	-0.04565	-0.042621	0.001852	0.349649	-0.135771	-0.065583	0.042587	0.161338	-0.128592	-0.235645	0.248583	-0.023621	-0.029538	-0.042492
1031747	ALKBH_A	A_NM_006020__Contig30575	Hs.94542	0.0270651	0.0126795	-0.003012	-0.072899	-0.165578	0.150552	0.0997185	0.0165775	0.11215	0.033381	0.0502585	-0.009065	0.060419	0.182975	0.0474875	0.115723	0.0770625	-0.017036	0.05645	0.029747	0.0162305	-0.17262	-0.0178295	0.0423835	0.0027025	-0.213365	-0.131306	-0.062633	0.0283515	0.039683	0.0047085	-0.010018	-0.0154945	-0.0006705	-0.10392	-0.0750745	0.063624	0.158314	0.036017	-0.03122	-0.072837	-0.058352	0.02662	0.0852835	-0.011596	0.0032925
69002	ANGPTL4	NM_016109	Hs.9613	-0.288301	-1.03361	-0.552988	-0.47896	0.791114	-0.058155	-0.16919	-0.223183	-0.583832	-0.197735	-0.542189	-0.155394	-0.555392	-0.255585	0.569223	-0.534353	-0.400763	0.100753	-0.481468	-0.342879	-0.2917	-0.189539	-0.1638	-0.30443	-0.450762	-0.382588	0.757305	0.372228	-0.577013	0.174176	-0.216751	-0.569853	-0.291352	-0.284511	-0.258321	0.122963	-0.166983	0.431587	-0.482679	-0.272116	-0.321082	-0.57211	0.038112	-0.277625	0.316896	-0.132087
795178	LDHC	NM_002301	Hs.99881	0.0278123	-0.012496	-0.39182	-0.109575	-0.110016	-0.017737	-0.171489	-0.627148	0.010886	-0.084665	0.008176	-0.257822	-0.079264	-0.029194	0.03172	0.077871	-0.016295	0.117599	0.069374	0.047532	0.003742	-0.137678	0.032393	0.17659	0.193419	0.182341	0.105947	-0.076131	0.07023	0.056865	0.032486	0.021042	-0.010396	-0.059296	-0.014175	-0.034448	0.059783	-0.068349	0.122723	0.09527	0.000676	0.051126	0.129407	0.071878	0.059059	0.126403
[truncated: 36 more columns]

## Sheet: Validation_all
CloneID_Original(Stanford_Array)	Symbol	Systemic_name	unigene_new_Rosetta	Average_hypoxia_for_LR_training	6	8	11	13	17	27	39	48	57	60	103	113	118	123	125	129	131	132	134	140	149	156	169	172	175	178	180	183	186	190	193	195	200	212	215	218	221	227	228	230	233	241	246	250	252
Label LR					6__0	8__0	11__0	13__0	17__0	27__0	39__0	48__0	57__0	60__0	103__0	113__0	118__0	123__0	125__0	129__0	131__0	132__1	134__0	140__0	149__0	156__0	169__0	172__1	175__0	178__0	180__0	183__0	186__0	190__1	193__0	195__1	200__0	212__0	215__0	218__0	221__0	227__1	228__0	230__0	233__0	241__0	246__1	250__0	252__0
Non_centered_Pearson					0.269322	0.204334	0.556129	0.532624	0.27409	0.221106	0.474212	-0.101007	0.229463	0.0217578	0.135811	-0.0330379	0.37198	0.393447	0.292874	0.446541	0.145019	0.513991	0.152456	0.411861	0.201321	0.356888	-0.101838	0.498317	0.0207412	0.27024	-0.267365	0.297319	-0.312929	0.571736	0.595263	0.301371	0.467643	-0.293119	-0.396458	0.0739866	0.389752	0.314245	-0.140367	-0.418977	0.317808	-0.30314	0.00902323	0.430381	0.464042
395708	DPYSL4	AB006713	Hs.100058	0.00771222	0.016742	0.007116	0.028909	-0.145541	-0.158907	-0.053745	0.047097	0.309382	-0.13179	0.06828	0.020651	0.044339	-0.007059	-0.125305	-0.087617	-0.059225	0.175283	-0.072978	-0.152452	-0.20528	0.260226	0.057242	0.126258	0.031853	0.134627	-0.055608	0.080099	-0.150287	-0.107482	-0.045862	-0.041957	0.351928	-0.008154	0.270859	-0.042503	0.433315	-0.179368	-0.358632	0.005816	0.025392	0.096268	0.014046	0.205892	-0.073217	0.045407
345849	LOX	NM_002317	Hs.102267	-0.0365284	-0.084763	-0.142625	-0.149239	-0.216096	0.10101	-0.064745	0.169896	0.147841	-0.254862	-0.21269	-0.040672	0.223773	0.082518	-0.072544	-0.259602	-0.011497	-0.000433	-0.002581	-0.046948	-0.052207	-0.196545	-0.020341	-0.167864	-0.116264	0.149701	0.047069	0.073365	0.069387	-0.063274	0.103925	0.022119	0.079753	-0.016413	0.036959	0.808726	-0.023692	-0.081428	-0.130999	0.261847	0.534042	0.227723	0.280483	0.093917	0.08426	-0.084281
324785	P4HA2	NM_004199	Hs.104772	-0.0806043	-0.171711	-0.084894	0.002568	0.115223	-0.013384	-0.055417	-0.086183	-0.098178	-0.241459	0.053255	0.166133	0.109304	-0.070429	0.007792	-0.262946	-0.113691	0.145607	-0.004047	0.088143	0.020104	0.025821	-0.064399	-0.333615	-0.250868	-0.096873	0.021129	0.328644	-0.053179	0.066312	0.038421	-0.042391	0.577057	0.00947	0.007686	0.290977	0.028445	-0.105822	-0.062144	0.099858	0.430539	0.148076	0.108873	0.066563	-0.101501	0.007869
75254	CSRP2	NM_001321	Hs.10526	-0.0301823	-0.250218	0.247337	-0.118233	-0.293996	-0.045003	-0.074114	-0.034666	0.416135	0.255993	-0.204528	0.230959	0.280815	-0.048047	-0.224584	-0.146085	-0.151677	-0.161899	-0.109744	0.090359	-0.295092	0.319174	-0.051219	-0.731846	-0.119359	0.474187	0.049701	-0.150836	-0.135873	0.590509	-0.128561	-0.06172	-0.112502	-0.213389	0.235804	0.610327	-0.311742	0.237463	-0.322812	0.356876	0.224897	-0.004369	0.170199	-0.20557	-0.199052	-0.09994
625875	ERO1L_A	A_Contig57222_RC_NM_014584	Hs.10949	0.0194343	-0.228188	-0.115732	0.0606185	-0.2521	-0.194154	-0.026724	0.028277	-0.056212	-0.121116	-0.0356575	0.0737485	0.104834	0.112743	0.056686	-0.092695	0.0268385	-0.179976	-0.101235	0.274189	-0.160025	0.0487255	-0.095036	0.0243315	-0.0476605	0.144908	-0.004973	0.0557785	-0.024365	0.132532	-0.131765	-0.102395	0.0550185	0.033228	0.235479	0.0634955	0.004577	-0.132284	0.232999	-0.055687	0.225623	-0.069694	0.036487	-0.11027	-0.0602895	0.234143
221707	DDIT4	NM_019058	Hs.111244	-0.112184	0.358816	-0.128608	-0.004743	-0.272741	-0.175016	-0.360678	-0.298244	0.350109	-0.117047	0.49737	0.145359	0.147665	-0.309002	-0.374426	-0.37679	-0.122924	0.272367	0.16685	-0.162315	-0.412587	-0.115555	0.092753	-0.238157	-0.188649	0.350927	-0.281905	0.453348	0.193663	0.603904	-0.037378	-0.077946	-0.150842	-0.354321	0.218788	0.149938	0.295386	-0.144435	-0.144228	0.182356	0.24404	-0.312401	0.24515	0.098653	0.140287	-0.250765
1571993	CTSF	NM_003793	Hs.11590	-0.0367427	0.310197	-0.304201	-0.095625	0.049543	0.173284	0.0899	-0.065373	-0.23116	-0.436946	-0.284255	-0.531391	-0.054211	-0.100911	0.059895	0.086075	0.156317	-0.528477	-0.055812	-0.030738	0.119117	-0.293558	0.010024	-0.111703	-0.221535	-0.112242	0.077185	-0.396449	0.101184	-0.312804	0.02912	0.121225	0.052707	-0.054781	-0.19769	-0.092594	-0.130451	0.317221	0.166852	0.002859	0.015656	0.231157	-0.228698	-0.141873	0.189882	-0.305235
246851	HIPK1	AB014530	Hs.12259	0.0612044	0.132426	-0.205626	0.107349	-0.216049	-0.01961	0.103368	0.118018	-0.192651	-0.117369	-0.069135	0.097537	0.123636	0.04582	0.167378	0.062968	-0.034148	0.081882	-0.016331	0.076546	0.041712	0.142301	-0.082555	-0.119056	0.084011	0.060375	0.005539	-0.103537	0.075741	0.072628	-0.064415	0.076398	0.04744	0.238642	0.034189	0.02037	0.087526	0.209687	0.206119	-0.027133	0.10845	0.084367	-0.158066	-0.166137	0.014396	-0.018234
823691	CCNG2	NM_004354	Hs.13291	-0.147689	0.207661	-0.628557	0.111114	-0.175892	0.025498	0.212527	0.062882	-0.381099	-0.300566	0.024604	-0.232556	-0.093545	0.032404	-0.107596	0.135094	-0.024135	-0.791731	-0.087097	-0.07112	0.031731	-0.211063	0.018184	0.163897	0.099767	-0.30314	0.24675	-0.191336	0.212737	-0.500686	-0.029724	0.107342	-0.512923	0.08382	-0.311469	-0.545165	-0.046571	0.15261	0.279337	0.033969	-0.358607	0.202353	-0.262732	-0.534856	0.042775	-0.32513
365098	BNIP3L	NM_004331	Hs.132955	-0.0539218	0.418573	0.119022	-0.074625	-0.20107	0.17016	0.225872	-0.00217	0.093858	-0.072509	0.15133	-0.290018	0.063392	0.195787	0.004537	0.070245	-0.026339	0.166444	0.140623	-0.069587	-0.129334	-0.306091	0.041672	0.200547	-0.258021	-0.061392	-0.089717	-0.147193	0.080266	-0.009734	-0.105962	-0.113726	-0.070164	-0.176	-0.032862	0.238891	-0.084681	0.093114	-0.006747	0.019781	0.163686	0.147531	-0.09136	0.222203	-0.113897	-0.009334
1925587	KIAA1285	AB033111	Hs.145661	0.024234	-0.069617	0.428924	-0.061506	0.208254	-0.13874	-0.13007	-0.128636	0.17504	0.270354	-0.043382	0.071213	-0.041262	-0.003031	-0.117307	-0.10063	-0.001405	0.223556	-0.040581	-0.099193	-0.044276	-0.536244	-0.037523	0.002201	-0.045678	0.174857	-0.066413	0.021675	-0.09703	0.084217	0.015776	-0.000337	0.006241	-0.018583	0.187316	0.358692	0.01848	-0.091208	0.060036	0.240544	0.101029	-0.007308	0.092932	-0.53536	-0.079791	0.072216
744923	KIAA0776	AB018319	Hs.149367	-0.0316523	-0.167382	-0.21803	0.034558	-0.249885	-0.143946	0.084458	0.10974	-0.012631	0.04229	-0.038282	-0.123032	-0.248967	0.110951	-0.008395	0.071766	-0.030254	-0.184157	-0.082598	0.111018	0.017662	0.05936	-0.093369	0.15568	0.015787	0.067487	0.125917	-0.068371	-0.037493	-0.210748	-0.098726	-0.10168	0.029773	0.044719	-0.014018	-0.229593	-0.212918	0.119566	0.234178	-0.121293	-0.05207	-0.136025	-0.102389	-0.25337	0.115957	0.151389
471725	ITPR1_A	A_D26070_NM_002222_Contig36193_RC	Hs.149900	-0.0509337	0.224642	-0.355329	0.172939	-0.2729	0.019232	0.04552	-0.0470327	-0.459064	-0.466026	0.0278763	-0.0391303	-0.159963	0.645346	0.0598567	0.131267	-0.027302	-0.30588	-0.259344	-0.133366	-0.019277	-0.0863393	-0.089267	0.00384533	-0.238116	-0.396695	-0.0126617	-0.0668197	0.0248243	-0.169664	0.042184	0.047631	-0.276865	0.107801	-0.0829543	-0.31808	0.275959	0.135254	-0.000870667	-0.36843	-0.26464	0.175885	-0.403445	-0.133291	-0.065644	-0.200409
2308429	PPFIA4	AB020704	Hs.153648	0.0188049	0.102394	0.173671	0.054612	0.129785	-0.023819	-0.068875	-0.019402	0.060541	0.128646	0.020699	-0.065118	0.058689	-0.015566	-0.016988	0.077157	0.020592	0.137717	0.003627	0.009494	0.045352	0.279135	0.004149	0.040607	-0.074796	-0.031196	0.011568	0.017038	0.052505	0.019198	0.005766	0.031306	0.013429	0.015884	0.11133	0.030146	0.035835	-0.039274	-0.032895	-0.041254	0.028082	-0.028917	0.119592	0.312782	0.032783	-0.001196
823578	STC2	NM_003714	Hs.155223	-0.134513	0.292777	-0.333019	-0.311934	-0.3052	0.814587	0.511058	0.021609	-0.259377	-0.436709	-0.841291	-0.292468	-0.27247	-0.117898	0.039356	0.152701	0.426483	-0.18274	-0.069376	-0.013366	-0.220178	-0.158527	0.219616	-0.128474	-0.271909	-0.223683	0.129686	-0.32224	0.043095	-0.139824	0.026073	0.10721	-0.135372	0.438445	-0.096548	-0.126557	-0.115614	-0.338818	-2	-0.18139	-0.257642	0.250847	-0.154479	-0.314555	0.135728	-0.2285
770868	NAB2	NM_005967	Hs.159223	0.00389511	0.09661	0.092282	-0.037651	0.164556	0.051652	-0.071292	0.028565	-0.037127	0.135218	0.1069	0.016924	0.101474	0.003581	0.06762	0.080502	0.003688	0.017293	0.005022	0.075583	0.083011	0.220883	0.087133	0.175525	0.048664	0.009246	-0.000503	-0.018892	0.06463	-0.010583	0.061505	-0.014044	0.004521	0.041581	-0.060424	-0.023673	0.049366	-0.027212	0.049586	0.061088	-0.044898	0.038538	0.09656	-0.040397	-0.007149	0.068095
454665	E2-230K	AK000926	Hs.16130	-0.00985111	0.031781	0.209457	-0.050478	0.066262	-0.049144	-0.107164	-0.020595	-0.000107	-0.191901	-0.08432	0.196034	0.223864	-0.090645	-0.003009	-0.056282	0.031264	0.298492	-0.102615	-0.011858	-0.049495	0.582675	-0.059506	-0.20168	-0.201685	0.103332	-0.151538	0.141049	-0.01339	0.231744	-0.070388	-0.207031	-0.004466	0.017528	0.11446	0.15909	0.023286	-0.111298	0.043304	0.277488	0.041345	-0.083442	0.142946	-0.058058	-0.05412	-0.321688
25389	SLC2A1_A	A_NM_006516_Contig40184	Hs.169902	-0.000875944	-0.0698805	0.245519	-0.0804375	-0.071083	-0.020315	0.0387385	0.0162265	0.164263	-0.165882	0.001914	0.076874	0.0617255	-0.0617735	-0.055675	-0.010701	0.049157	-0.0225525	-0.111176	-0.0379515	-0.0320915	-0.100241	-0.079419	0.027169	-0.175735	0.202054	-0.144726	-0.000629	0.0009825	0.274456	-0.058275	-0.032601	-0.0170935	0.102606	0.0511345	0.260217	0.164754	0.0062835	0.0175835	0.235038	0.175967	0.042238	0.245701	-0.114252	-0.12619	0.103639
195988	OCIA	NM_017830	Hs.170291	0.0267983	-0.123772	-0.138819	-0.059506	-0.093091	-0.074399	0.121108	0.12011	-0.239864	-0.093329	-0.070028	-0.142253	-0.042874	-0.037359	0.023564	0.061123	0.039926	-0.445128	0.142441	0.12977	0.045093	-0.133798	-0.013021	0.203357	0.068029	-0.401438	0.037238	-0.017639	-0.015983	0.156199	0.15813	0.02423	-0.141529	0.025944	-0.122711	-0.203445	0.078108	0.075407	0.126194	-0.059994	-0.168501	0.01488	0.037684	-0.185151	0.03057	-0.089632
469297	BHLHB2	NM_003670	Hs.171825	-0.159549	0.264995	-0.448415	-0.027425	-0.242662	0.283122	0.074711	0.102609	-0.201244	-0.28589	0.053387	-0.097028	-0.176107	-0.127197	0.014788	0.171333	0.268339	-0.051342	-0.336553	-0.227601	0.105153	-0.217184	0.204808	-0.06236	-0.393122	-0.031298	0.054738	-0.019913	0.144893	-0.031575	0.203802	-0.077152	-0.400269	0.033073	0.065604	-0.326218	0.304592	0.067376	0.019656	-0.189738	0.025228	0.196575	-0.196559	0.034313	0.051632	-0.146857
841620	DPYSL2	NM_001386	Hs.173381	0.0356441	0.060181	-0.084784	-0.146173	-0.218841	0.139982	0.110682	0.176182	0.037429	-0.162547	-0.114175	0.052655	0.035296	0.25208	0.084096	-0.114424	-0.045427	-0.238835	-0.089479	0.067102	-0.179362	-0.05586	-0.012798	-0.249214	-0.243556	0.246064	0.268374	-0.312723	0.135976	0.061285	0.00624	0.213745	-0.153247	0.025579	0.268041	0.485567	-0.142048	-0.184703	0.077185	0.278259	-0.02094	0.204643	0.2757	-0.069567	0.101274	-0.090861
1416782	CKB	NM_001823	Hs.173724	-0.0237563	-0.352523	0.436505	-0.187203	-0.454437	-0.492744	-0.374224	-0.68925	-0.28634	-0.751606	-0.286434	-0.174265	0.195607	-0.172903	-0.12083	-0.065483	-0.141721	-0.406403	-0.368866	-0.200381	-0.333345	-0.315963	-0.215519	0.390171	-0.336024	0.29137	-0.15641	0.101441	0.166609	-0.265563	-0.144724	-0.120168	0.005295	0.131687	-0.307585	0.427422	-0.313602	-0.233366	-0.015395	-0.285585	-0.202687	-0.157353	0.10965	0.013907	-0.139964	-0.062317
204569	HEMGN	NM_018437	Hs.176626	-0.0207888	0.033761	0.032297	0.141266	0.149817	0.252691	0.105372	0.155728	0.064	1.58347	-0.032077	-0.051428	0.012101	-0.160324	-0.015861	-0.153111	0.001102	0.023108	0.012557	0.013969	0.069384	0.125913	0.061584	0.050885	0.033465	0.669419	-0.026274	-0.023231	0.026054	0.059095	0.062254	-0.021459	-0.010242	-0.031313	-0.215935	-0.0087	0.03744	-0.00572	0.111631	-0.135377	0.04742	-0.072982	-0.088382	0.23472	-0.027461	0.174847
2310556	DUSP10	AB026436	Hs.177534	0.00592022	-0.031493	0.284686	0.131087	0.047355	-0.039695	-0.166465	-0.350124	-0.156118	-0.292256	0.125425	-0.108873	0.038366	0.231526	0.041235	-0.405463	-0.073472	0.012168	0.182028	-0.194466	0.257743	0.299548	-0.160325	0.378919	0.115782	0.121259	0.096807	0.208304	0.067805	-0.122228	0.116871	-0.139286	0.002388	-0.332057	0.192438	-0.318789	-0.011042	-0.029498	-0.208663	-0.225655	-0.010918	-0.238895	-0.275198	0.040659	-0.221011	0.289314
1455835	GAL3ST1	NM_004861	Hs.17958	-0.010895	0.38804	-0.032487	-0.085218	0.045419	-0.094721	0.059574	0.243997	0.299061	0.118833	-0.283974	0.049444	0.160246	0.007247	-0.03183	-0.004891	-0.047105	0.282606	0.001158	0.054584	0.038071	-0.348859	0.073196	-0.068852	-0.037104	0.029833	-0.071506	0.057267	0.009715	-0.085454	0.159837	0.00683	0.017649	0.091455	0.036068	-0.032411	0.006029	0.044494	-0.029205	0.159544	0.103384	-0.008736	0.395151	0.143535	0.144121	-0.000505
1758259	RAB20	NM_017817	Hs.179791	-0.0153206	-0.15246	0.120517	-0.040031	0.006265	-0.060502	-0.048975	0.036368	-0.082022	0.166598	0.091615	0.100825	0.295035	-0.201501	-0.133052	-0.025633	0.130507	-0.192378	-0.163251	0.029622	-0.014614	0.255127	0.116058	-0.228927	0.330432	-0.190516	-0.121696	0.028082	-0.054921	0.171954	-0.183505	-0.031109	0.076999	-0.060393	-0.058371	-0.219751	0.042727	-0.256216	-0.152404	0.021768	0.256769	0.112945	0.092909	0.2308	0.127953	0.034511
2557471	CRABP2	NM_001878	Hs.183650	-0.0621712	0.091905	0.190405	-0.057278	0.014166	-0.085888	-0.086073	-0.408948	-0.271522	0.40574	0.104279	-0.562747	-0.588129	-0.592136	-0.372327	-0.493007	-0.246087	-0.028231	0.374924	-0.047913	0.002867	0.044583	-0.142701	-0.084072	0.061054	-0.908746	-0.263585	-0.067039	-0.426895	-0.17898	0.115442	-0.271314	0.079222	-0.167073	-0.28418	-0.425708	-0.078631	-0.042484	0.231856	-0.244013	-0.089904	-0.173605	-0.363402	0.032383	-0.505316	-0.191444
46958	SULT4A1	NM_014351	Hs.189810	0.0267227	0.13313	-0.00919	0.014717	-0.096494	0.110179	0.116935	0.091202	0.178692	0.286569	0.046571	0.048195	-0.041939	0.000978	-0.063234	-0.064046	-0.036239	0.180317	0.004642	-0.066836	-0.010067	-0.115465	-0.02143	0.077409	0.040592	0.470693	0.074553	0.003838	0.003672	-0.055952	0.035429	-0.103876	0.014623	0.143984	0.042619	-0.016699	-0.022533	-0.101589	0.310385	0.262685	-0.155724	-0.124121	-0.132189	-0.096703	0.122427	0.052686
2322039	PPL_A	A_NM_002705__Contig34999_RC	Hs.192233	-0.0612476	-0.0172595	0.034806	-0.135185	-0.095167	0.051238	0.0430015	-0.063358	-0.0901045	-0.349686	0.022939	-0.0858195	0.0350785	-0.089102	-0.0061305	0.143865	-0.0467835	-0.0162455	-0.165177	0.028656	0.141931	0.0930645	0.0542005	0.111312	-0.125785	-0.172422	0.130024	-0.0288685	-0.0366665	0.149303	-0.088768	0.0774215	0.219229	0.2904	0.041299	-0.0135285	0.055217	0.0238525	0.0772755	-0.037406	-0.013095	0.170943	0.200067	0.0147845	0.129021	0.169703
283142	KIAA1244	AB033070	Hs.194408	0.0203074	-0.0297	0.023312	-0.068191	0.218349	0.136533	0.219707	-0.026466	0.052874	0.045799	0.110791	-0.148725	-0.115076	0.026422	-0.053682	0.027311	-0.029917	0.017775	-0.03485	0.007853	0.048026	0.324948	-0.058656	0.042685	-0.062234	-0.047679	-0.001668	-0.032205	-0.003378	-0.09401	-0.083737	-0.075831	0.010545	-0.005381	-0.068213	-0.05661	-0.089537	0.165713	0.111075	-0.169383	0.02352	-0.13952	-0.088573	0.076862	-0.003589	0.102079
2562051	RAI3	NM_003979	Hs.194691	-0.0220817	-0.02929	-0.19464	0.114547	-0.072378	-0.156898	-0.616962	-0.284066	-0.574639	-1.00655	-0.105134	-0.687656	-0.161117	0.277755	-0.348569	-0.198134	0.312833	-0.283286	-0.26404	0.039727	-0.00063	0.010655	-0.030854	-0.054024	-0.667596	-0.690692	-0.398559	0.681903	0.162881	-0.871368	-0.230474	-0.290238	0.086394	-0.285182	0.105959	-0.134853	0.209976	-0.415118	-0.032897	-0.045543	-0.24583	-0.062936	-0.342545	-0.0916	0.47794	-0.058623
1902764	PFKFB3	NM_004566	Hs.195471	-0.124248	-0.443395	-0.395403	-0.601873	-0.40501	-0.074543	-0.290126	-0.494455	-0.299019	-0.145269	-0.023478	0.007123	0.109884	-0.47742	0.439214	0.443215	-0.145103	-0.331451	-0.380181	-0.093623	-0.059868	-0.232841	-0.171644	0.017344	-0.211604	-0.260546	-0.045981	0.393585	0.072187	0.330205	-0.196454	0.118838	-0.416846	-0.29209	0.064409	0.471833	-0.380869	-0.467678	0.290751	0.155291	0.220264	-0.453146	-0.117713	-0.207538	0.130317	-0.155114
1566955	KIAA1715	Contig45011_RC	Hs.209561	-0.0124467	-0.158311	-0.004822	-0.103765	-0.150379	-0.226084	-0.062655	0.023525	-0.088997	0.142741	-0.08871	0.088704	0.014383	0.136726	0.177842	-0.087846	-0.026609	-0.260418	0.154517	0.072285	-0.077333	-0.109386	-0.083385	0.089876	-0.050994	-0.139524	-0.009304	0.274515	-0.089359	-0.114116	-0.014912	-0.166513	-0.086109	-0.138889	0.076855	0.004094	-0.107673	0.211433	0.20746	0.051744	0.119721	-0.057563	-0.000171	-0.286444	-0.038336	0.068927
220376	TncRNA_A	A_U60873__AA553619_RC	Hs.240443	-0.0219346	0.210537	-0.0327985	0.076815	-0.099951	0.0610915	-0.073406	-0.220668	0.144753	-0.139472	0.15855	-0.0717885	-0.0566575	-0.015195	-0.0012875	0.327071	0.038958	0.379692	-0.023451	-0.011618	-0.07752	0.15967	-0.086038	-0.0192265	-0.235271	-0.163369	-0.0691715	0.0671665	0.0259995	-0.017928	-0.0591385	-0.0279845	0.018778	0.010448	0.015425	0.0390875	0.215647	0.328286	-0.085994	-0.036198	0.078858	-0.02472	-0.0564405	-0.008906	-0.154508	-0.202781
135900	ARRDC3	AB037797	Hs.24684	0.0548663	-0.200074	-0.141372	0.177463	-0.194202	0.260568	-0.002776	-0.087935	0.247054	-0.23032	-0.106892	-0.071441	0.192942	-0.101664	-0.061745	0.087284	-0.055567	-0.33321	0.049787	-0.109658	-0.129038	0.104377	0.043235	-0.245141	0.009813	0.139091	0.085072	-0.112047	-0.01845	0.193138	0.059127	0.162356	0.098147	-0.04362	0.146222	0.216002	-0.012769	0.159713	-0.027205	0.171615	0.130124	-0.01222	0.05756	-0.247958	0.139149	-0.059773
2220269	POU5F1	NM_002701	Hs.249184	-0.00470922	0.039065	-0.069982	-0.034386	-0.150347	-0.063348	-0.005343	-0.056541	0.142716	0.031464	0.404492	0.099638	0.00394	0.042229	-0.034041	0.003101	-0.049805	0.208403	-0.057364	-0.097521	-0.050901	-0.080687	-0.10322	-0.041813	-0.189292	0.19345	-0.016017	-0.076638	-0.112083	0.007347	-0.013635	-0.042009	0.105685	0.011304	0.120411	0.145377	-0.065043	0.004031	-0.13808	-0.024274	-0.001596	-0.047986	-0.072879	0.032742	-0.090324	-0.07609
565075	STC1	NM_003155	Hs.25590	-0.113343	0.509431	0.015113	-0.698502	-0.183037	0.603369	0.310992	-0.035582	-0.479215	-0.767254	-0.378678	-0.574935	-0.362563	-0.471607	-0.433616	-0.573276	-0.269814	-0.654119	0.995579	0.024198	-0.552282	-0.379324	-0.452219	0.212306	-0.135486	-0.421849	0.274745	-0.193946	-0.091515	-0.000605	0.286627	-0.299797	-0.374429	-0.29511	0.209069	0.135274	-0.294169	0.207958	-0.697833	-0.212935	-0.290921	-0.645662	-0.187524	-0.36023	-0.574471	-0.586416
841663	NARF_A	A_NM_012336__AL137729	Hs.256526	0.00425139	-0.192228	0.166176	-0.007875	-0.038181	-0.115058	-0.059256	0.096514	0.037693	1.14732	-0.050896	0.0616895	0.0416965	-0.0432135	-0.0878675	-0.125483	-0.015586	0.053646	-0.030629	-0.0578075	-0.127167	0.229317	-0.0401745	0.0853455	0.025414	0.098688	-0.082548	0.0699825	-0.046657	-0.021656	-0.0691285	-0.113153	0.0669035	-0.0781405	-0.0278695	0.246044	0.030988	-0.101407	-0.142543	0.159793	0.0416845	-0.071719	0.0907285	-0.103724	0.051218	0.0012305
950682	PFKP	D25328	Hs.26010	-0.28913	-0.581899	0.369174	-0.50594	-0.851569	-0.319814	-0.439215	-0.568925	0.023354	0.388491	-0.022149	0.039853	-0.041885	0.065853	-0.208707	-0.666152	-0.295191	-0.077498	-0.268192	-0.008405	-0.227598	-0.125818	-0.088825	0.155108	-0.44616	0.296455	-0.013344	0.244836	-0.298613	0.429306	-0.389563	-0.303637	-0.086783	-0.208267	0.252235	0.647582	-0.043874	-0.575086	-0.774021	0.431036	0.437906	-0.305106	0.111844	0.407197	-0.225953	-0.254673
430968	ENPP3	NM_005021	Hs.264750	0.00852178	0.075821	0.113128	0.110079	0.154638	0.151915	-0.198651	-0.012886	0.041274	0.085015	0.273806	0.054389	0.011569	0.112617	-0.076413	-0.069605	0.023738	0.008654	0.006377	0.000499	-0.067226	0.380637	-0.033715	0.041687	-0.092972	-0.005097	-0.06071	0.041013	0.018861	0.033237	0.050452	-0.001112	-0.021882	-0.001709	0.084602	0.06995	0.040846	0.012966	0.101663	-0.069567	0.167979	0.052881	0.112418	0.145036	0.010022	0.020496
308026	C6orf55	NM_016485	Hs.267288	0.0141849	-0.162173	0.04636	-0.067817	-0.151093	-0.105724	-0.125297	0.083645	0.043608	0.153451	-0.091936	-0.075373	-0.112199	-0.037213	-0.126965	-0.089714	-0.058667	-0.120074	-0.136655	-0.108274	-0.101685	-0.11658	-0.050982	0.069514	-0.026382	0.01135	0.008171	-0.021317	0.033699	0.093946	0.050224	-0.068791	0.069785	-0.099873	0.000987	0.175733	-0.09113	0.057603	-0.024461	-0.004653	-0.172254	-0.178045	-0.026809	-0.178855	0.061662	-0.038172
897567	LDHA	NM_005566	Hs.2795	-0.0188894	-0.17559	0.109462	0.091573	-0.116583	-0.225848	-0.290018	-0.058138	0.175782	-0.237226	-0.009359	-0.220359	0.088139	-0.05117	-0.262173	-0.1006	-0.006236	-0.100738	-0.064309	0.010482	-0.057002	-0.354155	0.007214	0.096924	-0.0528	0.10283	-0.171019	0.103316	0.03139	0.346644	-0.09432	-0.070062	0.083654	-0.288482	0.164675	0.288865	0.336099	0.03554	-0.024403	0.19766	0.350704	0.014576	0.141727	-0.204585	0.024662	0.055109
1492276	RNASE4_A	A_NM_002937__NM_001145	Hs.283749	-0.155316	0.446057	-0.359426	-0.102276	-0.049731	0.0979145	0.144817	-0.017634	-0.288837	-0.133141	0.0682165	-0.306341	0.271093	0.258458	0.138675	0.112512	-0.012936	-0.282181	-0.328094	0.167331	0.222609	-0.0353625	-0.022617	0.0645675	0.179664	-0.391469	0.0135875	0.113677	-0.052005	-0.324759	0.092019	0.0746035	-0.0551135	-0.20767	-0.113347	-0.140731	-0.089804	-0.060917	-0.216344	-0.283577	-0.072103	0.0557735	-0.0921955	0.049512	-0.0903915	0.04591
246620	STRBP	NM_018387	Hs.287659	0.0262513	0.012006	-0.051187	-0.008159	-0.032353	-0.0575	-0.005606	-0.340341	0.027219	0.38132	0.142492	-0.090435	-0.159341	0.074227	0.059255	0.095803	0.14706	0.190603	0.074437	0.094033	0.105177	0.033659	-0.182074	-0.038343	0.146049	0.122403	0.041786	0.048734	0.057893	-0.057502	-0.034253	0.028693	-0.09823	0.142763	-0.102059	-0.149199	0.069968	-0.063356	0.254702	0.159339	-0.218191	0.026501	-0.038283	-0.142957	-0.103422	-0.137526
428377	MGC26694	Contig1115_RC	Hs.303669	0.0481314	0.188956	-0.169337	-0.139642	0.051786	0.165154	0.083394	0.108925	-0.177398	0.000884	0.003846	0.040416	0.081097	-0.051294	0.016549	-0.066834	0.113468	-0.184509	-0.090835	-0.017002	-0.160023	-0.087428	0.052066	-0.370677	0.003944	-0.072674	0.016587	-0.101263	0.063132	0.025253	0.191484	0.139181	0.014957	0.012395	0.000643	0.296956	-0.06885	-0.015866	0.083339	0.083637	-0.203383	0.011033	0.131457	-0.020402	0.04272	-0.055714
856174	PIK3R4	Y08991	Hs.306747	-0.0408642	0.047779	-0.022026	0.062857	-0.07611	0.003918	0.041118	0.108353	-0.043444	-0.167308	-0.032408	-0.112367	-0.014031	0.070869	0.071623	0.084097	-0.005026	-0.259802	0.087806	-0.013133	0.002667	-0.103073	0.032738	0.121229	0.055039	-0.063352	-0.023541	0.085424	0.013871	-0.044956	0.054246	0.065084	-0.033517	0.086082	0.053597	-0.016064	-0.044635	0.009969	0.013127	0.008555	-0.160099	0.045969	0.036503	-0.268693	0.004552	0.149766
461769	HLA-DRB5	AF005487	Hs.308026	-0.0439019	-0.320552	0.407054	0.19471	-0.431537	-0.073089	-0.143469	-0.256737	0.109282	0.302661	-0.26834	0.159142	-0.637489	-0.142823	0.449941	-0.006463	-0.00692	-0.753089	-0.251026	0.17475	-0.164507	-0.319082	-0.266501	-0.41917	-0.504113	0.182194	-0.208215	0.0583	-0.31073	0.11991	-0.553887	0.205633	0.032363	-0.553559	-0.223881	0.048461	0.141397	-0.041459	-0.255611	-0.55183	0.259095	-0.170975	0.190825	0.643608	0.149644	-0.485148
49284		A_NM_004112__Contig49632_RC	Hs.31339	0.00588439	0.055255	0.0486085	0.0737755	-0.0107705	0.130431	0.0418145	-0.0278355	0.0494465	0.41183	-0.016639	0.026645	-0.0504815	-0.026464	-0.055932	-0.00759	0.0155765	0.0265185	0.0176675	0.0038815	0.0155575	-0.245247	0.015662	0.15096	0.0866865	0.0982845	0.0078245	-0.036218	-0.0362785	0.0383765	0.114203	0.003459	0.026238	0.022977	0.0305485	0.114984	-0.0094415	0.0530135	-0.058278	0.0462005	0.0089835	-0.0734735	0.0206395	0.061178	-0.028207	-0.0253375
234004	WSB1	NM_015626	Hs.315379	-0.0710821	-0.013124	0.03736	-0.024016	0.066677	0.051073	-0.051053	-0.237689	0.100176	0.115552	0.061819	0.087096	0.085464	0.037629	0.014807	0.014639	-0.039061	0.285055	0.038044	0.083995	0.124549	0.285882	-0.054645	0.040338	0.313718	-0.119359	-0.070844	0.078822	0.00408	-0.025746	-0.065681	-0.040049	-0.060313	0.21024	0.028307	-0.069928	0.040954	0.028695	-0.091592	-0.096342	0.053035	-0.073759	0.092948	0.076311	-0.098895	0.019665
1917716	NDRG1_A	A_NM_006096__Contig27182_RC	Hs.318567	-0.139158	-0.043086	-0.0512185	0.102304	-0.291727	-0.294919	-0.165226	-0.153334	0.153573	-0.846607	-0.153892	-0.135431	-0.0391965	-0.209396	-0.232999	-0.127499	-0.0751885	0.093478	-0.272648	-0.163665	-0.374438	0.198084	-0.135168	-0.094817	-0.153649	0.338423	-0.0787015	0.0990305	-0.232444	0.246224	-0.194469	-0.103526	0.143512	-0.11503	0.28663	0.298911	-0.033204	-0.206606	-0.128942	0.220114	0.169641	-0.173178	0.42323	-0.053312	0.0197945	-0.135624
204660	RTTN	AL117635	Hs.31931	0.0165367	-0.026292	-0.04708	-0.14556	-0.162273	0.021189	0.062048	0.061571	-0.12186	0.325876	0.194144	-0.039834	-0.110861	0.131009	-0.089761	0.059192	-0.068312	0.126783	0.014041	-0.018777	-0.070505	0.070487	0.049011	0.121203	0.139189	0.193919	-0.087273	0.009606	-0.057002	0.089954	0.048578	-0.028912	0.010498	0.046223	0.001248	0.098941	0.059079	-0.016159	0.292607	0.2459	0.00308	-0.076358	-0.01733	-0.372098	-0.01108	0.145813
377452	JMJD1A_A	A_NM_018433__AB018285	Hs.321707	0.00390767	0.080905	-0.0702505	-0.0719065	-0.155967	0.001818	-0.052808	0.221801	0.109345	-0.014314	0.01811	0.225404	-0.0093575	-0.0719185	-0.006667	0.031459	-0.004099	-0.177574	0.0791145	-0.0131565	-0.021759	-0.046975	-0.042574	0.266058	0.113559	0.06546	0.0027575	0.13088	-0.0013125	0.051149	-0.0513395	0.01864	0.0701615	0.096204	-0.129877	-0.0525035	0.188273	0.150839	0.191049	0.106356	0.01531	0.036345	0.261462	-0.273079	0.00404	0.141251
136919	CCL28	NM_019846	Hs.334633	0.0198353	-0.080312	0.308916	-0.204574	-0.020856	-0.143475	-0.123095	-0.323734	-0.107783	-0.237491	-0.107513	-0.172672	-0.237254	-0.234052	-0.004872	0.475347	-0.071544	0.015309	-0.129847	0.098194	-0.055902	0.325936	0.004716	-0.159093	-0.190398	-0.287492	0.056819	-0.200472	0.181099	0.154926	-0.196133	0.123499	-0.029691	-0.032456	0.133844	-0.140132	-0.108583	0.108686	-0.142075	-0.012969	-0.071461	-0.050612	0.239793	0.326056	-0.036949	-0.145072
52422	SLC1A6	NM_005071	Hs.337391	-0.00694233	0.041278	0.040436	-0.019999	0.205739	0.035645	-0.059601	0.072259	0.054106	-0.056891	0.127016	-0.024117	0.089873	0.028117	-0.006861	0.008355	0.058369	0.052928	0.00203	-0.052102	0.062963	0.079283	0.040958	0.063479	-0.033525	0.003786	0.014325	-0.032912	0.013195	0.272675	-0.011286	-0.014275	-0.029253	-0.035114	0.067402	0.056922	0.011201	0.06393	1.0208	-0.061911	0.113251	0.080518	0.03785	0.168078	-0.025734	-0.037751
711698	BRCA2	NM_000059	Hs.34012	0.009552	-0.123293	-0.027932	0.048987	-0.111304	-0.402625	-0.008678	-0.141801	0.168892	0.699134	-0.037454	0.254758	-0.048104	0.010146	-0.000388	-0.07706	0.01178	0.29674	-0.014693	-0.005612	-0.035377	-0.237162	-0.040012	0.123513	-0.089672	0.000158	-0.012736	-0.136101	0.096442	0.069641	-0.075172	-0.03803	0.040031	-0.043394	0.012884	-0.026372	0.014712	-0.035648	0.145111	0.054426	0.015902	-0.171926	0.059696	0.015819	-0.076394	0.091769
504421	ADFP	NM_001122	Hs.3416	-0.0522402	-0.323178	0.191282	-0.197213	-0.19804	-0.06366	-0.119638	-0.274426	0.08371	0.320224	-0.276646	0.438445	0.252514	-0.092594	0.011426	-0.06529	-0.037855	0.135345	-0.079988	0.06798	-0.332907	-0.234733	-0.135592	-0.369256	0.001912	0.279855	-0.253732	0.267778	0.01693	0.514235	-0.187757	-0.06199	-0.077027	-0.377144	0.113982	0.284416	0.183308	-0.308582	-0.409225	0.300311	0.180034	-0.173928	0.389492	-0.085755	-0.054927	-0.339608
1630936	EXOSC4	NM_019037	Hs.343589	0.0276874	-0.038143	0.093516	0.372358	-0.12329	0.002726	-0.049295	0.064334	-0.034398	-0.01849	-0.029648	0.068495	-0.164567	-0.14082	-0.128316	-0.091722	0.172321	0.168188	-0.04473	-0.061973	-0.11936	-0.02471	0.043964	0.034745	-0.048726	0.146627	-0.123154	0.165302	-0.02339	-0.037944	-0.060118	-0.026678	0.120749	-0.057539	0.073753	0.22567	-0.117615	-0.110094	0.0338	-0.034251	-0.03699	-0.024415	-0.020523	-0.042621	0.026594	-0.094474
383098	PRODH_A	A_NM_016335__NM_005974	Hs.343874	0.00812217	-0.0392565	-0.0221605	0.403173	-0.079221	-0.069776	0.026509	-0.0125085	-0.015593	-0.134047	0.0785465	-0.007341	0.246353	0.020546	0.0174255	0.0025235	-0.0247535	-0.0628355	0.123811	-0.064319	-0.097724	0.047005	0.061584	0.043339	0.052593	-0.0878705	0.033062	0.179834	-0.0669535	-0.102014	0.0237755	-0.035642	-0.0048975	-0.0177855	-0.102914	-0.0229935	0.07207	-0.005591	-0.0204885	-0.048708	-0.0606945	-0.0516095	-0.083033	0.002747	-0.0470645	0.161221
269425	ZFHX1B_A	A_NM_014795__AF161345	Hs.34871	0.0192369	-0.136789	0.134489	0.0069915	-0.223519	-0.058726	0.0092985	-0.111538	-0.067064	0.123205	-0.091658	-0.0295645	0.155907	0.0070345	0.212	0.174041	-0.046884	0.123474	0.009332	0.094397	-0.141003	-0.122829	-0.0734405	-0.438314	-0.0998245	-0.217939	-0.046967	0.044294	0.0642205	0.061882	-0.112615	0.0992695	-0.016767	-0.084978	0.216099	-0.102708	-0.194445	-0.060499	-0.290231	-0.140341	0.130724	0.0413455	-0.0250305	0.09194	-0.102473	-0.194139
366815	SOX4	NM_003107	Hs.357901	0.0524401	0.022468	0.027075	0.025387	0.337916	0.105436	0.096347	0.164418	0.297612	-0.062666	0.092557	0.094618	-0.166175	-0.061224	-0.034521	-0.087863	-0.07892	0.073453	0.030437	-0.093996	0.000509	-0.065766	-0.102211	0.050814	-0.02683	0.242646	0.085448	0.021189	-0.013049	0.024227	-0.024454	-0.017364	0.03091	0.052101	-0.044111	0.072988	0.005769	-0.039395	0.06602	0.168248	-0.003915	-0.230301	0.123424	0.313334	0.11433	0.080051
45512	LOC283666	AA608991_RC	Hs.359394	0.020381	0.033695	0.05318	0.024979	0.119115	0.187786	-0.148198	0.014705	0.066682	-0.039754	-0.073452	-0.060243	-0.014661	-0.033835	0.047555	0.023086	0.048259	0.062585	-0.008367	-0.030736	0.019039	0.112161	0.066103	0.065806	-0.044631	0.039036	-0.006693	0.002383	0.056918	0.033191	0.070391	0.037073	0.075328	0.004785	0.044506	-0.006098	0.046598	0.011691	0.04164	-0.008154	0.028795	0.035556	0.137029	0.298988	0.038441	0.072833
882434	KIAA0779_A	A_Contig46050__Contig52501_RC__Contig63482_RC__AB018322	Hs.362996	0.0132809	0.0798535	0.0717475	0.0661468	-0.0127015	0.154323	0.0158403	0.0245435	0.0938537	-0.077784	0.0498823	-0.0389143	-0.0673377	0.121329	0.0396725	0.0443575	0.0773618	0.0811732	0.13029	-0.09679	-0.0704623	-0.420292	-0.00932775	0.135861	0.025651	-0.0433705	-0.0145435	0.001772	0.00078475	-0.0383908	-0.00875875	0.0456375	0.002407	0.058285	-0.00150525	0.0206762	0.087349	0.0904268	-0.010915	0.0159872	-0.0468342	0.0224008	-0.0551248	-0.165515	0.011487	-0.0588835
162310	PMP22	NM_000304	Hs.372031	-0.03636	0.046423	-0.415911	-0.067716	-0.210039	0.238767	0.003091	0.310039	-0.162051	-0.386434	0.211863	0.018871	0.153848	0.141859	0.027713	-0.017221	-0.071899	-0.26767	-0.131701	0.020911	-0.155578	0.130401	0.125074	-0.240139	0.271844	-0.227362	0.14828	0.245999	0.041993	-0.018931	0.110183	0.034211	-0.04571	0.186318	-0.00149	0.011816	-0.090837	-0.205451	-0.154917	0.087696	0.069926	0.173097	0.336096	0.013061	0.194811	0.022541
219949		Contig44269_RC	Hs.37648	0.0513911	-0.097063	-0.410994	-0.137205	-0.36853	-0.1276	-0.159126	-0.040062	-0.013276	-0.183183	-0.016773	0.053968	0.0169	0.153171	0.076283	0.086309	0.013997	-0.091449	0.057287	0.120097	0.127445	-0.387826	-0.09236	-0.452437	0.124433	0.095092	0.163011	-0.019364	-0.03574	-0.069729	-0.015789	-0.000998	0.050063	0.065022	0.285708	-0.062922	0.072602	0.05453	0.106024	-0.009865	0.149378	0.179507	0.118311	0.124513	-0.018458	0.051406
2449679	PLXNB3_A	A_NM_005393__AB033032	Hs.380742	0.0242923	-0.050472	0.059775	-0.233583	-0.081762	-0.233075	-0.04328	0.014506	0.060842	-0.11007	0.203677	0.0684095	-0.120289	-0.134405	-0.083565	-0.151921	-0.030325	0.260452	-0.0053145	-0.0064545	0.104968	0.360517	-0.0442705	0.0313085	-0.0096895	-0.004853	-0.012061	0.040964	-0.036803	0.127304	-0.01714	-0.0517995	0.0253825	0.0538065	0.0476765	-0.01106	0.0507355	0.0276835	-0.002712	-0.019497	0.0421135	-0.005412	0.023385	0.161011	-0.0388315	0.097356
431280		Contig56534_RC	Hs.381220	0.084006	-0.261481	0.576166	0.134907	-0.140593	-0.126054	-0.257207	-0.384001	0.146867	0.61493	-0.150244	0.18021	-0.166991	-0.099767	0.120679	-0.037261	-0.102567	-0.156691	-0.302706	0.000251	-0.159055	-0.127154	-0.04207	-0.276529	0.085385	0.166419	-0.174104	-0.011088	-0.064176	-0.03514	-0.118769	0.049965	0.002483	-0.25978	-0.047201	0.251896	-0.070448	-0.124071	-0.28289	-0.103197	-0.028487	-0.131418	0.058937	0.224947	-0.127315	-0.12715
45632	GYS1	NM_002103	Hs.386225	0.0393064	0.080028	-0.044958	0.033984	-0.004928	0.01412	0.017717	-0.002342	0.048941	0.079794	0.07306	0.031762	0.007288	0.058922	0.017178	0.052501	0.111642	0.103633	0.021224	0.009327	-0.022248	-0.222292	0.026607	0.059389	0.049758	0.080249	0.01465	0.028154	-0.031847	0.063696	0.031931	0.019064	0.134803	0.038481	0.05955	0.05385	0.108076	0.058901	0.010097	0.086679	0.041479	0.003702	0.040084	0.039967	0.010892	0.073314
502151	SLC16A3	NM_004207	Hs.386678	-0.0947687	-0.622183	0.514617	-0.228432	-0.400486	-0.234728	-0.359778	-0.261259	0.088353	-0.113131	-0.19506	-0.114057	-0.050305	-0.062986	-0.078401	-0.449718	-0.099765	-0.118296	-0.189744	-0.04574	-0.381296	-0.37089	-0.096476	-0.175687	-0.266059	0.049721	-0.301243	0.266521	-0.131615	0.147998	-0.143109	-0.221401	0.075681	-0.042059	0.247291	0.520559	-0.029894	-0.194454	0.280749	0.03908	0.381471	-0.086069	0.308559	0.207804	0.009188	-0.111459
488505	SLC6A8	NM_005629	Hs.388375	-0.0672676	-0.004398	0.09066	0.24589	-0.065897	0.024097	-0.026606	0.009602	0.001553	-0.363381	-0.136796	-0.018376	-0.062314	0.078502	-0.164411	-0.023235	0.094717	0.330837	-0.150468	-0.095066	-0.052376	-0.146294	0.112127	-0.006941	0.01383	0.282101	-0.041404	0.091105	-0.003511	0.394418	0.060931	-0.007163	0.029674	-0.011004	-0.020826	0.27761	0.097579	0.118421	-0.019546	0.111168	0.111751	-0.08487	0.064145	0.060521	-0.009405	0.083072
809569	WASPIP_A	A_NM_003387__Contig46778_RC	Hs.401414	0.0128796	-0.0459725	0.123948	0.0679645	0.108006	0.056201	-0.048725	-0.099159	-0.0463825	0.134034	-0.07909	0.013426	0.0158235	-0.094918	0.0188265	-0.011787	-0.0193975	0.019047	0.015397	0.0403295	-0.025646	0.151253	-0.024156	-0.104934	-0.0067595	-0.0176995	0.0090225	-0.043305	0.005136	0.0331365	-0.0077315	0.0048565	-0.0212055	-0.0619875	0.0730025	0.053541	0.005733	-0.021071	-0.045157	-0.124915	0.007681	-0.02972	0.0913025	0.236326	0.0157735	-0.075999
487371	FBXO32_A	A_Contig56270_RC__Contig57076_RC__Contig50592	Hs.403933	-0.125716	-0.190396	0.0349727	0.0740047	-0.121313	-0.0788267	-0.109858	0.146968	0.267077	-0.632354	-0.0181923	0.128778	0.067902	0.0682857	-0.112433	-0.0387923	0.0494443	0.0427627	-0.16776	-0.0396857	0.142484	-0.187391	0.052743	-0.367623	-0.152907	0.176665	0.390008	0.18274	-0.168402	-0.071807	-0.0606423	0.11141	0.26521	0.0264373	0.173685	0.197903	0.235977	0.185793	-0.0522437	0.0127087	0.069264	-0.0862617	0.586736	-0.227993	0.0948023	-0.173395
595318	SLC6A3	NM_001044	Hs.406	-0.00562689	0.052857	0.046523	0.013933	0.058664	0.00011	-0.047876	-0.027235	-0.000838	-0.127069	-0.057752	-0.044259	0.000447	-0.006646	-0.033766	-0.08473	-0.022655	0.012278	0.086954	-0.065495	0.038669	0.142068	-0.08394	0.028151	-0.046428	0.005447	-0.049427	0.0233	-0.060363	-0.045552	0.112104	-0.009189	0.042076	-0.013297	0.072524	-0.009006	-0.016166	-0.027304	-0.030702	0.023695	0.021694	0.065667	-0.043133	0.115906	0.038095	-0.017772
1637282	HK2	NM_000189	Hs.406266	0.0675644	0.070349	0.013892	0.21903	-0.090055	-0.099277	0.012891	0.086299	0.131266	-0.12407	0.157076	0.126749	-0.018185	0.014688	-0.050672	-0.037349	0.069412	0.079314	0.111419	-0.063757	-0.058781	0.035151	0.02517	0.032224	0.03541	0.049506	-0.022841	0.130038	0.056293	0.127944	-0.059016	-0.005344	0.0567	-0.019662	0.037041	0.286966	0.283084	-0.014029	0.054752	0.149414	0.088708	-0.037913	0.164385	-0.061856	0.056614	0.000504
741474	GPI	NM_000175	Hs.406458	0.0126013	-0.147509	0.045906	0.02832	-0.003787	-0.199676	-0.256944	-0.207893	0.170203	-0.090751	-0.131321	0.006276	0.007142	0.057243	0.000947	-0.045264	0.024707	0.066268	-0.098975	-0.01834	-0.013379	-0.179952	-0.00444	-0.015769	-0.188117	0.256538	-0.143291	-0.059191	0.154301	0.078535	-0.130147	-0.047746	0.499066	-0.21095	0.079794	0.082077	0.311343	-0.146694	-0.037483	0.355121	0.330106	-0.043191	0.292225	0.324354	-0.010979	0.031451
454930	NAV2	Contig40599_RC	Hs.407934	-0.00299567	0.011581	-0.137711	-0.007146	0.246299	-0.280188	-0.040565	-0.126442	-0.102216	-0.928416	-0.031391	0.022098	0.130335	-0.000815	-0.022339	0.124118	0.031548	0.043615	0.010951	0.065126	0.154829	0.443186	0.033438	0.081311	0.55856	-0.181351	-0.020534	-0.085431	0.025655	-0.011286	-0.040398	-0.014201	-0.006624	-0.071922	0.168564	-0.038957	0.037648	-0.010568	0.029426	0.04658	0.028731	0.039333	0.173875	0.168819	0.056645	-0.021215
171916	CNTNAP1	NM_003632	Hs.408730	-0.0127668	0.029537	0.062147	0.000745	0.198132	-0.036964	0.030598	0.109164	0.033415	0.090772	0.070981	0.179126	0.140747	0.009908	0.031205	0.095794	0.080239	0.081454	-0.05747	-0.027815	0.070487	0.489569	0.052617	0.101719	-0.029238	-0.045493	0.011544	-0.003066	0.044395	-0.084188	-0.044472	-0.048091	-0.078758	0.02491	0.138768	0.014691	0.034418	0.024323	1.82367	0.107939	0.110256	0.116553	0.148369	0.220031	0.038731	0.016904
263013	PLOD2	NM_000935	Hs.41270	0.00428611	-0.039132	-0.129675	-0.240641	-0.446777	-0.279741	-0.213922	0.054382	0.047093	-0.121389	-0.275555	0.040894	-0.080363	-0.011673	-0.126443	-0.200086	-0.000432	-0.183343	-0.053358	-0.062964	0.046282	-0.277431	0.037625	-0.023047	-0.038633	0.155463	-0.077504	0.165493	-0.069213	-0.033959	0.046368	-0.090527	0.001025	-0.036555	0.229002	0.18748	-0.103633	0.019238	-0.072063	0.114291	0.340956	0.014969	0.120695	-0.543032	-0.077115	0.083738
244307	SERPINE1_A	A_NM_000602__M16006	Hs.414795	-0.0938327	-0.199584	-0.29496	0.135014	-0.216383	0.19218	-0.0363595	-0.205268	-0.191109	-0.099577	-0.049147	-0.0369475	-0.123684	-0.270871	0.214563	-0.278269	-0.088625	-0.063393	0.039968	-0.115525	-0.250536	-0.075595	0.120784	-0.319559	-0.145146	0.206286	-0.082787	0.246525	-0.0076675	0.257588	-0.0513275	-0.100065	-0.127009	0.0677345	0.592898	0.107872	0.100596	-0.388081	-0.054944	0.0347045	0.426349	-0.342839	0.322475	-0.086667	-0.0568675	0.066598
714437	SEMA4B	Contig1386_RC	Hs.416077	-0.144547	0.32684	-0.338028	0.125713	0.188809	0.009072	0.115853	-0.003234	-0.142768	-0.595073	0.229483	-0.486484	0.04712	-0.198996	-0.168362	-0.088262	-0.120033	-0.61368	-0.271016	-0.18677	-0.00957	0.122653	0.295478	0.189267	-0.069204	-0.345831	0.026274	0.193805	0.246854	-0.048233	0.151683	-0.189239	0.07456	0.01899	-0.208131	-0.036276	-0.005788	-0.123934	0.247955	-0.215681	0.115066	0.0074	0.080241	0.076135	0.167812	-0.301646
129332	MEG3	NM_018514	Hs.418271	-0.102382	-0.125828	0.106042	0.119154	0.358791	0.008529	0.000306	0.273951	-0.014878	0.006607	0.268804	0.000227	0.19844	-0.331493	0.002085	-0.040034	0.070854	0.008923	0.005643	-0.043299	0.075584	0.369024	0.073594	0.045845	-0.120277	0.036484	-0.076266	0.024268	0.02069	-0.00813	-0.075267	0.01006	0.012179	-0.078421	-0.15121	-0.15214	0.027261	-0.026407	-2	-0.182921	0.030735	-0.061951	-0.0563	0.211644	0.048432	-0.153664
753467	SLC2A3	NM_006931	Hs.419240	-0.00973811	-0.2556	0.003068	-0.063725	-0.174148	0.034725	-0.127985	-0.020667	0.116964	0.199385	-0.161418	0.143148	0.045347	-0.149079	-0.159108	-0.091843	-0.171288	-0.103507	-0.135216	0.03523	-0.163581	0.150494	-0.067918	-0.365705	-0.138507	0.129669	-0.177405	0.005722	-0.091675	0.298192	0.053582	-0.04309	-0.052341	-0.10228	0.456491	0.031571	0.203068	-0.287003	-0.294615	0.263745	0.319707	0.031384	0.32621	0.198636	-0.033571	0.093192
79629	CXCR4	NM_003467	Hs.421986	0.0144068	-0.218121	0.341427	0.097903	-0.085335	0.011533	-0.480597	-0.221298	-0.009806	0.04973	-0.122716	0.489821	-0.298324	-0.214636	-0.021148	-0.312305	-0.214687	0.306831	0.074813	-0.196978	-0.092735	0.183628	-0.107459	-0.07792	-0.154535	0.120692	-0.396259	0.07767	-0.032658	0.414148	-0.156905	-0.053121	-0.215634	-0.421183	0.301237	0.303427	-0.104873	-0.136281	-0.339065	-0.116445	-0.057693	-0.194081	0.024154	0.221046	-0.244782	-0.166079
2283783	CRA	NM_006697	Hs.425144	-0.0228952	0.006646	0.017223	-0.023837	0.156731	0.129687	0.020778	-0.010396	0.058766	0.179299	0.139757	0.028616	0.029913	0.110614	0.07153	0.081656	0.009197	-0.014654	0.004704	0.022666	0.07193	-0.025663	0.048711	0.126045	0.085719	-0.002315	0.02119	0.047764	0.048422	0.039481	0.049245	-0.021716	0.017726	0.01327	-0.038415	-0.021568	-0.070247	-0.028088	0.044013	0.12147	-0.026286	0.076575	0.155195	0.034796	0.014319	0.031207
66715	PPP5C	NM_006247	Hs.431861	0.00435122	0.02382	0.136336	-0.010957	0.197414	0.147724	0.268695	-0.03679	0.097023	0.150313	0.05853	0.001602	-0.042	0.003866	-0.056715	0.044565	0.010321	0.152494	-0.011207	0.020292	0.050434	0.231658	0.033266	0.136806	-0.035936	0.029734	-0.015159	0.076639	0.015912	0.094276	-0.024489	-0.040772	-0.014222	0.04946	0.049497	0.124357	0.018681	0.036143	0.048958	0.051054	0.011355	0.013701	0.026348	0.171823	0.008598	0.025482
1521706	JAG2_A	A_NM_002226__Contig51202_RC	Hs.433445	-0.00882644	0.0848225	0.0476425	0.051967	0.145649	-0.102848	-0.08729	-0.044931	0.078446	1.05809	0.082066	0.021591	-0.0161795	-0.043553	-0.0299515	0.185244	0.0286615	0.159217	0.041116	0.120233	0.22785	-0.037081	0.130928	0.0544025	0.0832595	0.002559	-0.001025	-0.0653665	0.0704395	0.0449995	-0.005678	0.06015	0.010396	-0.048869	-0.051445	0.0161905	0.028842	-0.0603425	-0.102196	0.0914115	0.07902	-0.134921	0.156959	0.200008	-0.0996395	-0.0495135
1645668	PDK1	NM_002610	Hs.433611	0.0380602	0.02358	0.232401	0.006677	0.101179	-0.006468	-0.036101	-0.030282	0.207011	0.130226	0.113427	0.022715	0.036233	-0.137385	-0.060313	0.007426	0.01181	0.139522	0.080734	-0.010231	-0.010909	0.026821	0.038059	0.028782	-0.366736	0.127393	-0.017183	-0.012559	0.147666	0.028376	0.049534	0.036953	-0.030382	-0.029157	0.110182	0.254768	0.04911	0.040575	-0.082958	0.031883	0.139694	-0.048549	0.119248	0.252697	0.052101	0.009261
42906	MPP2	NM_005374	Hs.436326	0.00317522	-0.012476	0.085394	-0.120472	-0.016398	-0.084962	0.075928	0.199138	-0.025936	0.132456	-0.039761	0.072141	0.000411	0.040587	-0.045473	0.037472	0.004001	0.032611	0.023844	0.01908	0.148698	-0.071035	0.11348	0.090273	0.303794	0.078901	-0.01808	0.069257	0.048334	0.070012	0.1301	0.031711	0.009746	0.026336	0.06555	-0.025293	-0.024685	-0.019024	0.546012	0.006543	-0.010131	-0.059566	-0.053291	-0.241186	0.037318	-0.000486
595078	BHLHB3_A	A_Contig50565__Contig2710_RC	Hs.437282	0.0568979	0.151047	0.151314	0.0129465	-0.097173	0.102231	0.0413005	0.061963	-0.158545	-0.284066	0.0633485	-0.046472	-0.04308	-0.134063	0.086341	-0.176365	0.101894	0.112253	-0.0077845	0.0146445	0.32577	-0.129767	0.100365	-0.316234	0.065716	-0.0582695	0.188864	0.0287615	0.0636625	0.065214	0.012325	0.204455	-0.0473935	0.0464275	0.233389	-0.119449	-0.0199645	0.186017	-0.120048	-0.0906755	0.0161835	0.361551	-0.100303	0.0607255	0.132123	-0.0115235
704049	LPIN2	NM_014646	Hs.437425	0.0682633	-0.202777	0.200344	0.088867	-0.069948	0.028861	0.036792	-0.063788	-0.018462	-0.105109	-0.176761	0.139738	-0.066602	-0.156488	0.078134	-0.107599	-0.128973	-0.070637	0.096412	0.001702	-0.20621	0.134377	-0.048223	-0.382609	0.180643	-0.08095	0.048375	0.017565	-0.094539	-0.166013	-0.103888	0.199689	-0.000504	0.043942	-0.086442	-0.127075	-0.168731	-0.097554	0.086816	0.203004	-0.107038	0.125115	0.153809	-0.08049	0.002087	0.098772
746007	FLJ10415	NM_018089	Hs.437647	-0.0424198	-0.079971	0.095559	-0.120602	0.06734	-0.034437	-0.062185	0.014416	0.091871	0.041975	0.219362	0.394233	0.129359	-0.04495	-0.031277	0.109175	-0.054916	-0.00036	-0.0856	0.117871	0.169644	0.153331	0.025226	0.026352	0.087459	-0.051641	-0.072073	0.050238	-0.095297	-0.176649	-0.168277	-0.096662	-0.070991	0.037259	-0.034216	0.020464	-0.165045	-0.169939	0.093705	0.183678	-0.068819	-0.031769	0.234332	0.13537	0.110291	-0.008281
220658	MSH2	NM_000251	Hs.440394	-0.0129786	-0.233398	0.21111	-0.079564	-0.083491	-0.265201	-0.112679	0.002083	0.25159	0.115829	-0.288379	0.282428	-0.128502	-0.134168	0.064752	-0.138669	0.067241	-0.007767	-0.060007	-0.062525	-0.079151	-0.139084	-0.096987	0.164169	0.095224	0.510296	-0.078528	-0.229653	-0.035231	0.102325	-0.002366	-0.048558	0.098857	-0.141027	-0.035455	0.078066	-0.161149	-0.092895	0.039127	0.285768	-0.215824	-0.064581	0.178239	-0.4495	-0.114325	0.084906
165921	CEP2_A	A_NM_007186__Contig33602_RC	Hs.440606	-0.00441783	0.06889	0.022731	0.073076	0.026617	0.136668	0.0148525	-0.0581955	-0.066727	0.077203	0.114683	0.094014	-0.0817535	-0.019331	-0.284281	-0.080147	-0.0168735	0.021647	-0.039093	0.074747	-0.0149715	-0.067447	0.0247975	-0.066937	0.222118	-0.010533	-0.0864915	0.08624	-0.0827675	0.040741	-0.0347475	-0.053816	0.010627	0.0116305	0.033746	0.0852035	-0.0289105	-0.073093	0.204889	0.0862965	-0.0376515	0.063866	0.125644	0.0608075	0.0377895	-0.025938
774446	ADM	NM_001124	Hs.441047	-0.284719	-0.51758	-0.149845	-0.299394	-0.662664	-0.590935	-0.346943	-0.627544	0.473612	0.044647	-0.084375	0.117314	0.175085	-0.484	-0.581529	-0.297413	-0.435993	-0.196381	-0.665234	-0.195484	-0.739228	-0.228536	-0.274919	-0.436412	-0.31983	0.484108	-0.524882	0.259913	-0.220902	0.324689	-0.701562	-0.54898	-0.055731	-0.867747	0.567167	0.535224	-0.0143	-0.584827	-0.54283	0.418572	0.690831	-0.407651	0.3878	0.291419	-0.636948	-0.544191
51843	PIAS2	Contig21098_RC	Hs.441069	0.0190044	-0.029443	-0.135152	-0.138005	-0.215045	-0.17111	0.080803	0.014073	-0.11025	0.094679	-0.027257	-0.015144	-0.083292	0.119818	-0.147518	-0.049331	0.052768	0.128033	0.003877	-0.075358	-0.06533	-0.225965	-0.069322	-0.05951	-0.05569	0.2347	-0.019966	-0.113906	-0.010403	0.118359	0.004838	0.028657	0.215046	-0.040639	0.090713	0.314406	-0.068515	0.050844	0.281348	0.237949	0.156126	0.086816	-0.006923	-0.138479	-0.012437	-0.089196
1570311	FAM13A1	NM_014883	Hs.442818	0.0623006	0.031235	0.152572	-0.118675	-0.045592	-0.104116	0.105272	-0.117093	-0.041088	0.024638	0.134596	0.053436	0.209998	-0.000844	-0.077947	0.063316	-0.013622	-0.0648	-0.08118	0.300059	-0.051134	0.229103	-0.032258	-0.127948	0.060167	-0.102618	-0.002704	0.144394	-0.000529	-0.033763	-0.013478	0.169484	0.061591	-0.06795	0.010114	-0.136681	-0.052492	0.116439	-0.308879	0.247075	0.094391	-0.023944	-0.095871	0.215063	-0.074428	-0.068713
929934	DST	AB018271	Hs.443518	-0.0479689	-0.079809	-0.192604	0.256782	-0.184696	-0.285506	-0.005028	-0.023324	0.074108	-0.346915	0.070412	-0.144277	0.037292	-0.016064	-0.04959	-0.257769	-0.184822	-0.376187	-0.051972	0.206266	0.147976	-0.400567	-0.029492	-0.135215	-0.29918	-0.033881	0.650745	-0.27504	-0.189599	0.250303	-0.230605	-0.072746	-0.29704	0.123852	0.309877	-0.410934	-0.396654	0.484079	-0.048179	-0.233661	-0.221284	-0.21958	-0.074511	-0.840181	-0.082151	0.133501
122982	EGLN3	Contig38674_RC	Hs.443906	-0.0644116	-0.002663	-0.14295	0.014139	-0.059823	-0.117616	-0.099944	-0.049561	0.032095	-0.372952	-0.138293	-0.003913	0.474528	0.11228	-0.267596	0.058347	-0.061599	-0.269422	-0.264089	-0.031359	-0.139715	-0.204046	-0.106248	-0.156514	0.086606	0.387688	-0.113004	0.244565	-0.008456	-0.149293	-0.13797	0.065892	0.105336	-0.054431	0.145183	0.129891	-0.036014	0.171463	-0.401621	0.007758	0.176685	0.033808	-0.116736	-0.334479	-0.204584	-0.142264
461759	OLR1	NM_002543	Hs.445299	0.0161834	-0.110916	-0.03723	0.196513	-0.330359	-0.059306	-0.250195	-0.012894	-0.089227	0.107758	-0.225222	-0.217221	-0.221898	0.250722	0.292506	-0.066132	0.075803	-0.100348	-0.02744	-0.006058	-0.098722	-0.638907	0.109984	0.029386	0.453743	-0.05321	-0.065522	0.048622	-0.01423	-0.08588	-0.00293	0.058762	0.033104	-0.018393	0.18898	-0.072772	-0.048984	0.028798	-0.149019	-0.211745	0.059061	-0.06846	-0.188972	0.182563	0.012816	-0.154277
725677	PCTK3_A	A_X66362__AL161977	Hs.445402	-0.0789336	-0.116901	-0.031614	-0.185165	-0.0790425	-0.199867	-0.28769	-0.009745	0.060095	-0.065585	-0.018749	0.162975	-0.117519	-0.258065	-0.0546005	-0.00385	-0.0825425	0.040549	-0.25106	-0.0477835	-0.0722925	-0.200994	-0.07972	0.01619	-0.19625	0.111253	0.0311265	-0.075166	0.043896	-0.0091585	0.063571	-0.101943	-0.0353605	0.0064425	0.107278	0.088526	-0.150488	0.089031	0.0545325	0.177026	0.033251	-0.214337	0.048394	0.070689	-0.194684	0.0893985
197651		Contig42328_RC	Hs.446589	-0.0143727	0.487977	-0.164922	-0.388219	-0.616295	0.042294	-0.418075	0.205948	0.221474	-0.899773	-0.143548	-0.255214	-0.38983	-0.239327	-0.183521	-0.19864	-0.096669	0.708452	-0.113739	-0.462168	-0.324934	-0.345445	-0.106532	-0.103658	-0.918541	-0.281862	0.096042	-0.294036	-0.147678	0.109611	-0.332129	-0.109715	-0.056683	0.010718	0.263847	0.12983	-0.166419	-0.101039	0.010099	0.246371	0.414779	-0.327623	0.161881	-0.209275	-0.461563	-0.342998
1581582	ZNF292	AB011102	Hs.448341	-0.0931663	-0.117835	-0.118685	-0.109144	-0.084722	-0.443457	0.027178	0.095496	0.430889	0.17889	0.043651	0.043887	-0.118735	0.186544	0.01147	0.225268	-0.145984	0.126279	-0.079743	-0.009379	0.061188	-0.14528	-0.273906	0.295002	-0.024023	0.234185	0.255236	0.020929	0.040083	-0.113793	-0.294052	-0.094622	-0.094052	0.098175	-0.142717	-0.38338	-0.438513	0.095722	0.182427	-0.034191	-0.114597	-0.45998	0.043773	-0.293539	-0.237896	0.114168
898218	IGFBP3	NM_000598	Hs.450230	0.0171446	-0.048945	0.045941	0.124251	0.068595	0.191888	-0.01097	0.114998	0.063063	-0.048872	0.078576	0.045613	0.001018	-0.043512	-0.007267	-0.07313	-0.002403	-0.016809	-0.058749	-0.055016	0.011603	0.052821	0.006472	-0.021018	-0.021676	0.008401	0.071768	0.033142	0.004089	-0.008194	0.039682	0.049156	0.020511	0.05609	0.155506	0.182574	0.098447	0.00152	-0.254584	0.059945	0.133044	0.023001	0.049225	0.186442	0.17995	0.045003
626773	PLEKHA2	Contig3015_RC	Hs.470847	0.0234208	-0.070327	0.084753	0.055264	-0.116774	-0.005365	-0.096308	0.471359	0.043316	0.176224	-0.081818	0.100988	0.046694	-0.191416	0.092316	-0.141168	-0.055726	0.114315	-0.14939	0.056348	-0.231285	0.007058	-0.038311	-0.144814	-0.108693	0.090124	0.200231	-0.018049	0.128526	0.09025	0.143807	0.207572	0.265971	0.171423	0.252458	-0.150974	0.151214	-0.044015	0.212498	-0.293879	-0.088654	-0.084271	0.055691	0.132723	-0.086239	-0.267136
714493	FNBP2_A	A_AK000885__Contig38681_RC__AB007925	Hs.5003	-0.021319	-0.117951	-0.0213827	0.0274893	-0.101916	0.0530703	-0.0730363	0.219112	-0.0828417	-0.122027	-0.199851	0.0459613	-0.0293433	0.055569	0.124433	-0.237303	-0.070921	0.108492	-0.0269067	0.007929	-0.187589	-0.303484	-0.002967	-0.0244047	-0.0187997	0.0878887	0.014538	0.0160613	-0.0774167	0.0720803	0.0123237	0.04807	0.0190137	0.017158	0.0770777	0.0253587	-0.065707	-0.0387453	-0.0696413	0.156431	-0.00438333	0.121625	0.025321	0.0535453	0.018591	0.0568577
843046	MKNK2_A	A_NM_017572__AL137615	Hs.512094	-0.1066	-0.0529775	0.0800555	-0.112526	0.0416505	0.0869295	0.012751	-0.0900935	-0.214011	-0.223564	0.167575	-0.20435	-0.153784	0.0873085	0.126213	0.373069	0.0816645	-0.040223	-0.153547	-0.0698145	0.171644	0.125893	0.125599	0.216848	0.066733	-0.286579	0.015692	0.0759955	0.208204	-0.127233	0.0332245	0.237088	-0.0441655	0.023241	-0.115571	-0.275669	0.142987	-0.220935	0.214925	-0.347292	-0.230255	0.0338055	-0.311053	0.277849	0.091756	0.092438
757462	E2IG5	NM_014367	Hs.5243	-0.0939337	0.109317	-0.050675	-0.314501	-0.062408	-0.101543	-0.130746	-0.17474	0.080342	-0.00483	-0.005898	-0.112422	0.022919	0.230056	-0.036975	0.121081	0.135414	-0.021496	-0.082076	-0.141898	0.170913	-0.170392	-0.031592	0.45015	-0.082505	0.107989	-0.090916	0.112208	-0.004934	-0.048176	-0.228756	-0.074668	-0.136955	-0.399421	-0.183386	0.085007	-0.11967	0.162487	-0.176034	0.05342	0.101923	0.078653	0.215334	-0.308453	-0.033559	-0.022919
130858	FAM29A_A	A_NM_017645__Contig42505_RC	Hs.54617	0.00857194	-0.032373	0.033301	0.027395	-0.16648	-0.0689085	0.0099885	-0.0527005	0.135907	0.348027	0.397259	0.35078	-0.134813	0.080466	0.033551	-0.016867	0.0432315	0.19474	0.0713745	0.017256	-0.052652	-0.269807	-0.0575065	-0.006493	-0.028938	0.232092	-0.0086485	-0.031391	0.0553275	0.194133	-0.049542	-0.039566	0.005685	-0.0259645	-0.032382	0.028507	0.0524415	0.012218	0.005206	0.0665675	-0.014067	-0.09077	0.051664	-0.0374625	0.030164	0.00894
1643566	CA9	NM_001216	Hs.63287	-0.403902	-0.5559	0.220043	-0.72986	-0.582536	-0.765818	-0.332077	-0.532962	0.550842	-0.426404	0.011827	0.224589	-0.112082	-0.581227	-0.602777	-0.411469	-0.482199	0.250062	-0.749252	0.190654	-0.328903	-0.312952	-0.532579	0.762483	-0.765235	0.130851	-0.447706	-0.115128	-0.594853	0.936117	-0.717257	-0.762756	-0.027969	-0.541708	0.382844	1.169	-0.075058	-0.106237	-0.297553	0.186272	0.567595	-0.006022	0.63075	0.185756	-0.547275	-0.032912
51344	C14orf132	AK001590	Hs.6434	-0.0525142	0.212992	-0.070924	0.054849	-0.076235	0.195047	0.043217	0.067069	-0.078868	-0.364779	0.138713	-0.286685	0.120141	-0.082883	-0.014179	-0.103235	-0.08653	-0.268399	-0.07123	0.002875	-0.079576	-0.16556	0.076937	0.222503	-0.055615	-0.325726	0.293622	0.212884	-0.118188	-0.104732	0.062278	0.084077	-0.045693	0.074144	-0.257711	-0.210587	-0.059462	0.17742	0.033191	-0.137202	-0.021683	0.421615	-0.17343	-0.052218	0.226695	-0.030351
48626	INSIG2	AL080184	Hs.7089	0.0392277	-0.102194	-0.03245	0.195114	-0.23192	-0.1208	-0.071729	0.094901	-0.03404	-0.269214	0.026764	0.07739	0.331371	-0.104419	-0.01847	-0.142903	0.045423	-0.428587	-0.027365	-0.13754	-0.132067	0.167173	-0.145638	-0.127521	0.08944	0.093989	-0.0024	-0.037371	-0.105306	-0.014185	0.02751	-0.018694	-0.064477	-0.053897	0.120882	-0.215606	0.099808	0.001146	-0.185922	0.176076	0.124315	0.006012	0.07112	-0.405877	-0.046507	0.080302
841664	CAV1_A	A_NM_001753__AF070648	Hs.74034	-0.0706069	-0.083177	-0.238207	-0.160632	-0.156316	0.112875	0.147483	0.0317565	-0.44554	-0.11183	-0.146809	-0.095713	0.106278	0.032295	0.0755535	0.109673	-0.088103	-0.15655	-0.009217	0.035714	-0.022507	-0.065715	-0.0600285	-0.389964	-0.0230705	-0.114652	0.0790225	-0.168189	0.0752455	0.149122	-0.193761	0.0419125	-0.0512525	-0.117904	0.0770365	0.070191	-0.180212	0.122475	-0.293549	0.147945	0.118557	-0.0441485	-0.185177	-0.0788425	0.095398	-0.209175
771323	PLOD	NM_000302	Hs.75093	0.0326534	-0.012818	0.002684	-0.098071	0.006557	0.035857	-0.043564	0.027255	0.283232	-0.041173	-0.003642	-0.069815	0.078919	-0.156054	0.008399	-0.008947	0.02534	0.065389	-0.055623	-0.137299	-0.149475	-0.152329	0.049907	-0.075839	-0.107224	0.013785	-0.005989	-0.015924	-0.044245	0.023917	-0.088433	-0.001038	0.269915	0.035565	0.03295	0.226999	0.034498	-0.097754	-0.066043	0.113883	0.215887	0.09743	0.199642	0.264167	0.037807	0.005446
51532	ARL6IP	D31885	Hs.75249	0.015584	-0.151199	-0.003623	-0.032188	-0.002314	-0.066562	0.062907	-0.011278	0.283569	0.197545	-0.240225	0.094323	-0.11234	0.185722	-0.215096	0.044054	0.025067	-0.03186	0.023824	-0.141348	-0.03237	-0.310254	-0.024675	0.319629	0.019821	0.041062	-0.088803	0.110042	0.019418	0.328431	0.032423	0.08742	-0.075813	-0.022724	-0.012022	0.026192	0.210332	0.041854	-0.022857	-0.088975	-0.131577	-0.170556	0.155099	-0.406775	0.152872	0.199744
838802	P4HA1_A	A_NM_000917__Contig19530_RC	Hs.76768	-0.1043	-0.074538	-0.205009	-0.255815	-0.230542	-0.195113	-0.05413	-0.17845	0.261359	-0.219446	0.0677535	-0.1595	0.114787	0.0090725	-0.080232	-0.0608085	-0.0485365	0.202886	0.0118415	0.003736	-0.095183	-0.114214	-0.157729	0.379933	-0.354164	-0.321678	-0.148964	0.25952	-0.041018	-0.227475	-0.234426	-0.0817435	-0.039673	0.0426385	-0.095337	-0.0888985	0.143604	-0.042031	-0.338227	0.0617915	0.139581	-0.0083025	-0.0038245	0.010658	-0.193496	0.200147
1420501	THOP1	NM_003249	Hs.78769	-0.0703028	-0.211226	0.269134	0.183632	0.289045	0.04682	0.032023	0.064691	-0.118816	-0.017477	-0.059824	0.085742	0.106775	-0.040892	-0.228258	-0.304121	0.126517	0.018008	-0.107525	-0.101911	-0.101624	-0.106329	0.004905	-0.017093	-0.091086	0.039715	-0.103728	-0.081089	-0.012716	0.022168	0.014331	-0.049429	-0.12364	-0.003042	0.151251	0.145233	0.173134	-0.624107	0.053148	0.101568	-0.099385	0.098154	-0.206612	-0.182148	0.068795	0.022507
949939	PGK1_A	A_S81916__NM_000291	Hs.78771	0.00140817	-0.0868645	0.106555	0.038294	0.021276	0.026199	-0.14972	-0.120162	0.172553	0.067593	-0.0051585	-0.098334	0.028122	-0.103131	-0.0698735	-0.063513	-0.031904	0.004447	-0.0209085	-0.050421	-0.070295	0.1592	-0.010811	0.058844	-0.122306	0.069278	-0.081552	0.137127	-0.081887	0.187395	-0.025668	-0.10378	0.0395135	-0.140638	0.113405	0.235806	0.182418	-0.0576225	-0.0497975	0.0702285	0.212357	-0.059788	0.0755035	-0.0020305	-0.066354	0.085405
1881104	GNRH1_A	A_NM_000825__Contig40036_RC	Hs.82963	0.0539031	0.0274455	0.0530475	0.086035	-0.0049285	0.0500385	-0.011921	0.0413225	0.137578	-0.105921	0.115678	0.0403765	-0.0274005	-0.0096135	-0.0492785	-0.0908745	-0.006152	0.0351465	0.055942	-0.03047	-0.025186	-0.056166	-0.001247	0.135321	0.025251	0.083777	-0.041978	0.02153	-0.0557605	0.0239025	0.034876	-0.0039695	0.0553445	-0.0246385	-0.068452	0.0899665	0.0012035	0.123898	0.117933	0.000165	-0.006921	-0.0455715	0.0024315	-0.186736	-0.000956	0.0524225
47481	CLECSF2	NM_005127	Hs.85201	-0.0207841	-0.119217	-0.059334	-0.012874	-0.284597	-0.289846	-0.127543	-0.310293	0.03601	0.489232	-0.165704	-0.148114	-0.03468	0.262059	0.130854	-0.037458	-0.015739	-0.247638	-0.073601	0.044865	-0.188054	-0.169602	-0.148859	-0.051821	0.14587	-0.049412	-0.035563	-0.025394	-0.01209	-0.195538	-0.14295	0.040177	0.01622	-0.188335	0.032711	-0.376161	-0.245307	0.14309	-0.260849	0.064959	0.092654	-0.101587	-0.109044	-0.083866	-0.254759	0.039569
824933	NF1_A	A_NM_000267__AF055023	Hs.93207	-0.0340264	0.0792185	0.028231	0.034702	0.050949	0.045509	0.110466	0.143643	0.052581	-0.080297	0.054772	-0.032074	-0.022956	0.025295	0.0890175	0.0023935	0.0175	0.0273115	0.02749	0.0148395	0.031402	-0.063816	-0.031036	0.098917	0.0023805	-0.103895	0.0922565	0.0657665	-0.041199	-0.045058	0.012812	-0.0237615	-0.0376515	0.065041	-0.003941	-0.087625	-0.0230615	0.0040945	0.322972	-0.06966	-0.0013655	-0.024292	0.0201435	-0.0016495	0.002544	0.034831
137554	C10orf10	NM_007021	Hs.93675	-0.00608089	-0.091555	-0.003131	-0.055588	0.069339	0.175021	0.320807	-0.036226	0.118273	0.17658	0.032844	0.396561	0.162692	-0.013793	0.010549	0.140291	-0.029035	0.293202	-0.062329	0.024134	-0.064419	0.310535	0.011062	-0.070282	-0.007912	-0.021442	0.0399	-0.00522	0.019812	0.190191	-0.038604	-0.005972	0.019053	-0.02261	0.298054	0.100275	-0.102791	-0.071056	-0.154159	0.028513	0.052639	-0.117536	0.237688	0.132459	0.112567	-0.037458
1031747	ALKBH_A	A_NM_006020__Contig30575	Hs.94542	0.0270651	0.02746	-0.036126	0.0755605	-0.0345275	0.291922	0.0216335	0.141676	-0.0669785	0.284597	-0.10784	0.0253745	0.0411695	0.132748	0.0549315	0.0312865	0.0333485	-0.0833325	0.121592	0.120742	0.04397	-0.327148	0.0512645	0.0996865	0.217418	0.049258	0.001419	0.141716	0.0363745	-0.028568	0.050188	0.0354265	0.0308875	0.002797	-0.14996	0.0504495	0.0427325	0.016949	-0.0785975	-0.006241	-0.034415	-0.012899	0.028859	0.0127975	0.044733	0.0594425
69002	ANGPTL4	NM_016109	Hs.9613	-0.288301	-0.467527	-0.358574	-0.814287	-0.661843	-0.196263	0.019767	-0.617465	0.282718	0.056307	0.231878	0.114864	0.263886	-0.334962	0.036992	-0.088579	-0.225429	0.209231	-0.304411	-0.111024	-0.436316	0.103211	-0.240823	-0.34354	-0.443645	-0.092394	-0.366667	0.335468	0.141117	0.421673	-0.777728	-0.260304	-0.347939	-0.5661	0.514784	1.10575	0.073422	-0.479167	-0.497488	0.347734	0.467777	-0.503407	0.564546	-0.208614	-0.57428	-0.609951
795178	LDHC	NM_002301	Hs.99881	0.0278123	-0.006716	0.072696	-0.077767	-0.052605	-0.18244	-0.100891	-0.008107	-0.171133	-0.080388	-0.269874	0.052053	-0.039997	0.059571	-0.173117	-0.099023	0.047589	0.346436	0.005522	0.019316	0.088074	0.025936	0.119331	0.078887	-0.050901	0.042716	-0.011314	0.027153	-0.000637	0.035224	0.040483	0.024452	0.016906	-0.011808	0.00625	0.091631	-0.029905	0.144794	0.019465	0.137788	0.008554	0.022143	0.032418	-0.295528	-0.031507	0.013412
[truncated: 35 more columns]
